# Supplementary material for: Combining GWAS and RNA-Seq Approaches for Detection of the Causal Mutation for Hereditary Junctional Epidermolysis Bullosa in Sheep
Source: PubMed Central journal article supplement (PMC4425408; doi:10.1371/journal.pone.0126416), 2015-05-08
Supplement: pone.0126416.s001.pdf [file pone.0126416.s001.pdf]

#####

```

# Program: needle
# Runday: Mon 15 Dec 2014 16:30:11
# Commandline: needle
#   -auto
#   -stdout
#   -asequence emboss_needle-I20141215-162649-0501-16776341-es.asequence
#   -bsequence emboss_needle-I20141215-162649-0501-16776341-es.bsequence
#   -datafile EDNAFULL
#   -gapopen 10.0
#   -gapextend 0.5
#   -endopen 10.0
#   -endextend 0.5
#   -aformat3 pair
#   -snucleotide1
#   -snucleotide2
# Align_format: pair
# Report_file: stdout
#####

```

#=====

```

#
# Aligned_sequences: 2
# 1: ENSOARG0000009764
# 2: KP025765
# Matrix: EDNAFULL
# Gap_penalty: 10.0
# Extend_penalty: 0.5
#
# Length: 32985
# Identity: 27411/32985 (83.1%)
# Similarity: 27411/32985 (83.1%)
# Gaps: 5486/32985 (16.6%)
# Score: 135284.0
#
#
#=====

```

|               |     |                                                     |     |
|---------------|-----|-----------------------------------------------------|-----|
| ENSOARG000000 | 1   | -----                                               | 0   |
| KP025765      | 1   | ggctcgcccgcgcgccgcatctggagccgcccagcggagcccagcgcggg  | 50  |
| ENSOARG000000 | 1   | -----                                               | 0   |
| KP025765      | 51  | gagggtgagtgccgccccaggtaggtccagccattccccgcactccg     | 100 |
| ENSOARG000000 | 1   | -----                                               | 0   |
| KP025765      | 101 | ccgcccctccagggccccgagccgcccaggctgggcgctctaggagg     | 150 |
| ENSOARG000000 | 1   | -----                                               | 0   |
| KP025765      | 151 | tttccgaggggagaagcggaaagggagtgcgcaccccagccccgggcagc  | 200 |
| ENSOARG000000 | 1   | -----                                               | 0   |
| KP025765      | 201 | ccgacggggagctgattggtgggcccggcggcttttgtttccccagctctt | 250 |
| ENSOARG000000 | 1   | -----                                               | 0   |
| KP025765      | 251 | cctttcctaaaggccggcccagggcaggtgccctgcctgcccgggtg     | 300 |
| ENSOARG000000 | 1   | -----                                               | 0   |

|               |      |                                                      |      |
|---------------|------|------------------------------------------------------|------|
| KP025765      | 301  | tgtccaggggacccccggcggaaaggggaacaggcagagctggagaaggcg  | 350  |
| ENSOARG000000 | 1    | -----                                                | 0    |
| KP025765      | 351  | cttggttgtcagacctctgggtggaggaggcagcaggagaggtctggg     | 400  |
| ENSOARG000000 | 1    | -----                                                | 0    |
| KP025765      | 401  | cgtcgggtgggcgcttgggagaagtagtgggcaggggccccggtgggtggc  | 450  |
| ENSOARG000000 | 1    | -----                                                | 0    |
| KP025765      | 451  | ctactgggctgggcacttctggggttcaaaaagaagcagccacctagagg   | 500  |
| ENSOARG000000 | 1    | -----                                                | 0    |
| KP025765      | 501  | cagagaccctccgatttggctgggtggtgccaccgtgcagctggggtctg   | 550  |
| ENSOARG000000 | 1    | -----                                                | 0    |
| KP025765      | 551  | gggactccttgattctcctctcctcctggctgggcacacgtctgccttgc   | 600  |
| ENSOARG000000 | 1    | -----                                                | 0    |
| KP025765      | 601  | tcccaaagtcagctcaggacacccttctccaggaagccctcctgacctc    | 650  |
| ENSOARG000000 | 1    | -----                                                | 0    |
| KP025765      | 651  | atggcccaccactgtgacctcctccagggccagccccctgtccccacct    | 700  |
| ENSOARG000000 | 1    | -----                                                | 0    |
| KP025765      | 701  | ctcagccccgggtggccctctccggtttaggtggggacctctagatggc    | 750  |
| ENSOARG000000 | 1    | -----                                                | 0    |
| KP025765      | 751  | tcctcctgggctccttcttctccccagtggcctggccacaccctgagccc   | 800  |
| ENSOARG000000 | 1    | -----                                                | 0    |
| KP025765      | 801  | aaggctggacggggttgtggctgcctcagaccacagctggatgtgaagtc   | 850  |
| ENSOARG000000 | 1    | -----                                                | 0    |
| KP025765      | 851  | tgcaggtctctgtcccaggggctgagcgggtaaaggaaaacaggaggga    | 900  |
| ENSOARG000000 | 1    | -----                                                | 0    |
| KP025765      | 901  | cagcggggaaggggtgtccgtctgtctccttggccttgaatctcgggtg    | 950  |
| ENSOARG000000 | 1    | -----                                                | 0    |
| KP025765      | 951  | atagagcagcagaggggcccagaggataggggaagcaggagggaagagagct | 1000 |
| ENSOARG000000 | 1    | -----                                                | 0    |
| KP025765      | 1001 | gtggagggcgggtgcagacgtgccaagcgggggtcccatggggtaggtat   | 1050 |
| ENSOARG000000 | 1    | -----                                                | 0    |
| KP025765      | 1051 | caggagaacgctgagcccacattatgtgggccatagcgtgtgtccaagag   | 1100 |
| ENSOARG000000 | 1    | -----                                                | 0    |
| KP025765      | 1101 | tatgtatgtccctgagcctgccagactgggtgtgccgctatgtgataaca   | 1150 |

|               |      |                                                     |      |
|---------------|------|-----------------------------------------------------|------|
| ENSOARG000000 | 1    | -----                                               | 0    |
| KP025765      | 1151 | gtgggtggcaagcactcacttccgggacccggctgctacataaaaaggcc  | 1200 |
| ENSOARG000000 | 1    | -----                                               | 0    |
| KP025765      | 1201 | ccgcgctggtgggaccagagtagcctggagggttcgtgttccaacggc    | 1250 |
| ENSOARG000000 | 1    | -----                                               | 0    |
| KP025765      | 1251 | tcttcccatgccgccacagtcacgtctcccaggaagcccacagtcctctt  | 1300 |
| ENSOARG000000 | 1    | -----                                               | 0    |
| KP025765      | 1301 | atgtgacatcttttcacccaccaatgactactttgaaaacttttaggga   | 1350 |
| ENSOARG000000 | 1    | -----                                               | 0    |
| KP025765      | 1351 | ggcccccttggtggtccagggttcccagggtgccaaagtggtaaggagtcc | 1400 |
| ENSOARG000000 | 1    | -----                                               | 0    |
| KP025765      | 1401 | gcctgccaatgcaggagacacgggtttgatccctgggtcaggaagatccc  | 1450 |
| ENSOARG000000 | 1    | -----                                               | 0    |
| KP025765      | 1451 | ctggaagagaagatagcaaccactccagtattcttgctggaaaactcc    | 1500 |
| ENSOARG000000 | 1    | -----                                               | 0    |
| KP025765      | 1501 | catagacagcaggcctggcggactccagtctgtgggtagcaaagagtc    | 1550 |
| ENSOARG000000 | 1    | -----                                               | 0    |
| KP025765      | 1551 | ggacatgcctgagcatgcatgcagtggtggtccagtggataggaatcggc  | 1600 |
| ENSOARG000000 | 1    | -----                                               | 0    |
| KP025765      | 1601 | gctctcactgtctgggcttggggtcaatccctgggtcaggaaccaaggctc | 1650 |
| ENSOARG000000 | 1    | -----                                               | 0    |
| KP025765      | 1651 | ccacaagtcactcggatggccaaaaacaaaaagcttttaggcagttc     | 1700 |
| ENSOARG000000 | 1    | -----                                               | 0    |
| KP025765      | 1701 | cctggtggccagggtggttaagactccatgctccaacacaggggtcacag  | 1750 |
| ENSOARG000000 | 1    | -----                                               | 0    |
| KP025765      | 1751 | gttcatttctggttggggaactaaaatttctcatgctgcaagattcagc   | 1800 |
| ENSOARG000000 | 1    | -----                                               | 0    |
| KP025765      | 1801 | cttagaaaaaaaaaaaaaagtttaaaaacacaagttgagaaaaacacaac  | 1850 |
| ENSOARG000000 | 1    | -----                                               | 0    |
| KP025765      | 1851 | actcctgtgtgcatcgctgctattttagagtctctgaatataatgtgaag  | 1900 |
| ENSOARG000000 | 1    | -----                                               | 0    |
| KP025765      | 1901 | gttaaatggggcgggggtgctgctgctgactgccccgtctcgtctggac   | 1950 |

|               |      |                                                     |      |
|---------------|------|-----------------------------------------------------|------|
| ENSOARG000000 | 1    | -----                                               | 0    |
| KP025765      | 1951 | aaaggggagcaggcagtcattccccactggttcctgtgcagattaaatg   | 2000 |
| ENSOARG000000 | 1    | -----                                               | 0    |
| KP025765      | 2001 | gcgattatgtacgtgacatgctgggcacttgcccattgtgtgccagcct   | 2050 |
| ENSOARG000000 | 1    | -----                                               | 0    |
| KP025765      | 2051 | gggggcacaggagagtgagtaagagccgggttgggcagtcctgtacctg   | 2100 |
| ENSOARG000000 | 1    | -----                                               | 0    |
| KP025765      | 2101 | catgtataatggtgccccaggggaagccggggaagcagccagtattgtgt  | 2150 |
| ENSOARG000000 | 1    | -----                                               | 0    |
| KP025765      | 2151 | agcctgtgggtgtggtgcctgtgccccaaaggctgcaggaaaaccatttcc | 2200 |
| ENSOARG000000 | 1    | -----                                               | 0    |
| KP025765      | 2201 | ccccagaagcaccctcctcggctggcttggggcacccttaccagcgc     | 2250 |
| ENSOARG000000 | 1    | -----                                               | 0    |
| KP025765      | 2251 | ccatcttagaggcgggctcctcccagctgactgcctgtggatgaggtgg   | 2300 |
| ENSOARG000000 | 1    | -----                                               | 0    |
| KP025765      | 2301 | agctcctggtcgccacctcggagagacggaagcatgccctcctgcagccc  | 2350 |
| ENSOARG000000 | 1    | -----                                               | 0    |
| KP025765      | 2351 | ctcgggtctccccagagcctgggggtgtgcctgccccacaagccaaggcct | 2400 |
| ENSOARG000000 | 1    | -----                                               | 0    |
| KP025765      | 2401 | gagcgaggactcaaggctgaggccagtaggcatggcctagtgcgggct    | 2450 |
| ENSOARG000000 | 1    | -----                                               | 0    |
| KP025765      | 2451 | gctgggtgactggctctggagaaggaggccgggcggtcactcttgcctc   | 2500 |
| ENSOARG000000 | 1    | -----                                               | 0    |
| KP025765      | 2501 | agctctgccaggccaggcgcctctggccagctcttctcttcagcaggctg  | 2550 |
| ENSOARG000000 | 1    | -----                                               | 0    |
| KP025765      | 2551 | tccatcttgaacgttctcaggaatgtcactgcctgccccgaaggcac     | 2600 |
| ENSOARG000000 | 1    | -----                                               | 0    |
| KP025765      | 2601 | caatgactcgagatggtttaaaagttgaaccaaagggccttccctgggt   | 2650 |
| ENSOARG000000 | 1    | -----                                               | 0    |
| KP025765      | 2651 | cagtgataaaagaatctgcctgccagtgccaggagacacgggttcaatccc | 2700 |
| ENSOARG000000 | 1    | -----                                               | 0    |
| KP025765      | 2701 | tgatccaggaagatcccacacgccgaggaggagctaagcccgtgtgccac  | 2750 |
| ENSOARG000000 | 1    | -----                                               | 0    |



|               |      |                                                       |      |
|---------------|------|-------------------------------------------------------|------|
| KP025765      | 2751 | accactgagactgtgccttagagcccaggagctgcaagtagagaaccac     | 2800 |
| ENSOARG000000 | 1    | -----                                                 | 0    |
| KP025765      | 2801 | cgcagggagaaccctgctcaccgcaattgaggagaaggcctagcacagcc    | 2850 |
| ENSOARG000000 | 1    | -----                                                 | 0    |
| KP025765      | 2851 | aaaagcaatgaataaataaatcgttttaaaaaaacagtgactcaaaggc     | 2900 |
| ENSOARG000000 | 1    | -----                                                 | 0    |
| KP025765      | 2901 | agatgggggtgtcctgggggtggctggcagtggtgtgtgtgtatgagtgggct | 2950 |
| ENSOARG000000 | 1    | -----                                                 | 0    |
| KP025765      | 2951 | gcaggggcttttaatccccctccaggctaactttctaaagggtgatctgc    | 3000 |
| ENSOARG000000 | 1    | -----AGGCACAGGTGCGGGACCCCCTC                          | 24   |
| KP025765      | 3001 | tcagaatcccccaactcaactcgggcaggcacaggtgcggggacccccctc   | 3050 |
| ENSOARG000000 | 25   | CTCTGATGGGCCAGGCAGCCATTACAGAACTTAGCTGAGTAGCAAATCAT    | 74   |
| KP025765      | 3051 | ctctgatgggcccaggcagccattacagaacttagctgagttagcaaatcat  | 3100 |
| ENSOARG000000 | 75   | GTCCTCCCTTACCTAGGCCCCAGTACTGCAGAGGGTCCCCCTCCTTCTA     | 124  |
| KP025765      | 3101 | gtcctcccttacctaggccccagtagtgcggagggtccccctccttcta     | 3150 |
| ENSOARG000000 | 125  | GTCTGTATCCCATCACCGAGGGCAAGTAAGCGGGCCAGGGCCCTTAGG      | 174  |
| KP025765      | 3151 | gtctgtatcccatcaccggagggcaagtaagcgggcccaggccctctagg    | 3200 |
| ENSOARG000000 | 175  | GTGGCCCTGTCCCTTCCAAGCCTGACCCAACCCAGTGGGGTCTGAAAGGC    | 224  |
| KP025765      | 3201 | gtggccctgtcccttccaagcctgacccaaccagtggggtctgaaaggc     | 3250 |
| ENSOARG000000 | 225  | GAGGGTGGAAAAAATCCCTGGTCTTCCCTCCAGGGAGCCCAGTACAAGA     | 274  |
| KP025765      | 3251 | gagggtggaaaaaatccctggctctccctccaggagcccagtagacaaga    | 3300 |
| ENSOARG000000 | 275  | GATCTAGCGGTGGGACAAGCTCAGAGCCCACAGTCCTCAGTGGTGAGAGG    | 324  |
| KP025765      | 3301 | gatctagcggtaggacaagctcagagcccacagtcctcagtggtgagagg    | 3350 |
| ENSOARG000000 | 325  | GTGGGGCCTCCCTGGCAGGGCGTAGGCCTACAGGGCATCTGGACACTCT     | 374  |
| KP025765      | 3351 | gtggggcctccctggcagggcgtaggcctacagggcatctggacactct     | 3400 |
| ENSOARG000000 | 375  | GGGGATGCCAAGGAAGGGGCAGAGGAAAAGAGGGATCAGGGTCTCTGGG     | 424  |
| KP025765      | 3401 | ggggatgccaaggaaggggagagggaaaagagggatcaggggtcctggg     | 3450 |
| ENSOARG000000 | 425  | CCCTGCCACTTGTAGGCCAGGTGGCCTCGGAACATCACTAAAATTCTCAG    | 474  |
| KP025765      | 3451 | ccctgccacttgtaggccaggtggcctcggaacatcactaaaattctcag    | 3500 |
| ENSOARG000000 | 475  | AGCCTCAGTTTGTACAGCTGTGCAATGGGAACGGTGGAGCTCTGATGAGG    | 524  |
| KP025765      | 3501 | agcctcagtttgtacagctgtgcaatgggaacggtggagctctgatgagg    | 3550 |
| ENSOARG000000 | 525  | ACCCAGTGAGCTGACACGTGGACCAGGGTTGTCAGGCATCATGTGTCAAT    | 574  |

|               |      |                                                       |      |
|---------------|------|-------------------------------------------------------|------|
| KP025765      | 3551 | accagtgagctgacacgtggaccagggttgtcaggcatcatgtgtcaat     | 3600 |
| ENSOARG000000 | 575  | TGTGGGTGTTTTACAGGAAGAGGAGGATGGCAGGGCCACATCCCAGCCCG    | 624  |
| KP025765      | 3601 | tgtgggtgttttacaggaagaggaggatggcagggccacatcccagcccg    | 3650 |
| ENSOARG000000 | 625  | TGGACCAGGCTGCTGCTGGCAGCCCTGCTGAGCGTCAGCTTCCCCGGGA     | 674  |
| KP025765      | 3651 | tggaccaggctgctgctggcagccctgctgagcgtcagcttccccgggga    | 3700 |
| ENSOARG000000 | 675  | CATGGGTGAGTCGGACACGCCCTGCAGCACCTCCTTGGTGGGGCCTCA      | 724  |
| KP025765      | 3701 | catgggtgagttggacacgcccctgcagcaccctccttgggtggggcctca   | 3750 |
| ENSOARG000000 | 725  | GCTTTCAAGGCCCTGCCCTTAAGGTATCAGGGGTGTGGGGGAGGCTGTC     | 774  |
| KP025765      | 3751 | gctttcaaggccctgcccttaaggtatcaggggtgtgggggaggctgtc     | 3800 |
| ENSOARG000000 | 775  | ACTCAGTGTCTGGCCAGACCCTCACTCAGCCATTCAGCAAACAGCCACC     | 824  |
| KP025765      | 3801 | actcagtgtctggcccagaccctcactcagccattcagcaaacagccacc    | 3850 |
| ENSOARG000000 | 825  | ACCCACTTCAAGGGTTGTGGAGCCATGATCCTGAGCTGCATGGCCAAAC     | 874  |
| KP025765      | 3851 | accacttcaagggttgtggagccatgatcctgagctgcatggccaaac      | 3900 |
| ENSOARG000000 | 875  | ACTTAGGGAAGCGCAAGGAGACTTGGTCTGAAGGAGGGAAAAGACATCCA    | 924  |
| KP025765      | 3901 | acttagggaagcgcgaaggagacttggctctgaaggagggaaaagacatcca  | 3950 |
| ENSOARG000000 | 925  | CTCAGAGAAGGCAGGCGCTTGAGGGTGTGCTAAGGCCTGGACAGCGGAG     | 974  |
| KP025765      | 3951 | ctcagagaaggcaggcgttgagggtgtgctaaggcctggacagcggag      | 4000 |
| ENSOARG000000 | 975  | TTGAAAGATTTTATGGGAATTTGAAGGAGAGGGAGGTGATCGACACAGGC    | 1024 |
| KP025765      | 4001 | ttgaaagattttatgggaatttgaaggagaggaggatgatcgacacaggc    | 4050 |
| ENSOARG000000 | 1025 | TCTCTGAGTGTCTGCAGTCCGCAAAGGGCTCCTACTGATGGAATAGTGCC    | 1074 |
| KP025765      | 4051 | tctctgagtgtctgcagtccgcaaagggtcctactgatggaatagtacc     | 4100 |
| ENSOARG000000 | 1075 | TGTCAGTGGACGCCATGGCTGGCAGCTCAAAGCAGTCCGTGGTGGGAACA    | 1124 |
| KP025765      | 4101 | tgtcagtggacgccatggctggcagctcaaagcagtccgtggtgggaaca    | 4150 |
| ENSOARG000000 | 1125 | TTTATACTTTGAAATCGTAAATGCTGCAAGTCAGGGCTTCCCTGCCCT      | 1174 |
| KP025765      | 4151 | tttatactttgaaatcgtaaatgctgcaagtcagggcttccctgccct      | 4200 |
| ENSOARG000000 | 1175 | CACCGGAGACTGCTAAACATTGACAGCACTCCTTTTCTGAAAGTCCA       | 1224 |
| KP025765      | 4201 | caccggagacactgctaaacattgacagcactccttttctgaaagtcca     | 4250 |
| ENSOARG000000 | 1225 | GGAGCCCTGCCACTAGCAAGGGCGGGTCTCACTGTGATTTTAACTGAA      | 1274 |
| KP025765      | 4251 | ggagccctgccactagcaagggcgggtcctcactgtgattttaactgaa     | 4300 |
| ENSOARG000000 | 1275 | CAAAACCAGACGGTATCCTAACCTTTGGGGAAACTGAAGTTTACCTCAT     | 1324 |
| KP025765      | 4301 | caaaaccagacggtatcctaacctttggggaaactgaagtttcacctcat    | 4350 |
| ENSOARG000000 | 1325 | TTATTTATTA AAAA CT TACCATGTGCAGGGCATAGGCTCAGCACTAGAGA | 1374 |
| KP025765      | 4351 | ttattttatataaaaacttaccatgtgcagggcataggctcagcactagaga  | 4400 |

|               |      |                                                         |      |
|---------------|------|---------------------------------------------------------|------|
| ENSOARG000000 | 1375 | CGCTGATAAAAGAAACACAGTCCCGGAGGAGCAGGCAAGGGGGCTGGTTA<br>  | 1424 |
| KP025765      | 4401 | cgctgataaaaagaaacacagtcccgaggagcaggcaagggggctggtta      | 4450 |
| ENSOARG000000 | 1425 | GGGTGTCCCCGCCAGCAAATGGGCCAGCGCCTCCATCTCAGCCCCTACCC<br>  | 1474 |
| KP025765      | 4451 | gggtgtccccgccagcaaatgggccagcgcctccatctcagcccctaccc      | 4500 |
| ENSOARG000000 | 1475 | TCCTTCCCTCCAGACTTGGGTGGAAAATCCCAGTTTGAGACCTGGCTCTT<br>  | 1524 |
| KP025765      | 4501 | tccttccctccagacttgggtggaaaatcccagtttgagacctggctctt      | 4550 |
| ENSOARG000000 | 1525 | CAGGTTGCTAACCACATAGCCACTGGCCTCTGTTTCCCCCTCTGTATCTT<br>  | 1574 |
| KP025765      | 4551 | caggttgctaaccacatagccactggcctctgtttccccctctgtatctt      | 4600 |
| ENSOARG000000 | 1575 | GGAAGAGAGTCCCTACCTCTTTCAAATGAGGATGCTTAAGGGGAGGGCTT<br>  | 1624 |
| KP025765      | 4601 | ggaagagagtccctacctctttcaaatgaggatgcttaaggggagggtt       | 4650 |
| ENSOARG000000 | 1625 | GGTCCTGGGGGAGACCTATCTCAGTGGGCCACCCCGCTCTGTTCCGAG<br>    | 1674 |
| KP025765      | 4651 | ggtcctgggggagacctatctcagtgggccacccccgctctgttccgag       | 4700 |
| ENSOARG000000 | 1675 | CGAACCGCTGCAAGAAGGCCAGGTGAAGAGCTGCACCGAGTGCATCCGC<br>   | 1724 |
| KP025765      | 4701 | cgaaccgctgcaagaaggcccaggtgaagagctgcaccgagtgcacccgc      | 4750 |
| ENSOARG000000 | 1725 | GTGGACAAGGACTGCGCCTACTGCACGGACGAGGTGTGTTGCTGCCAGC<br>   | 1774 |
| KP025765      | 4751 | gtggacaaggactgcgctactgcacggacgaggtgtgttgctgccagc        | 4800 |
| ENSOARG000000 | 1775 | CGGACCGCCTCCCCAGCCTGTGCACCCACCCCTGGGCTCTGGCCGAGTCC<br>  | 1824 |
| KP025765      | 4801 | cggaccgcctccccagcctgtgcacccacccctgggctctggccgagtcc      | 4850 |
| ENSOARG000000 | 1825 | ACATTTGCCCCACCCTCGGCCAGCCTTGGGCCAGCCGGGCGTGGGACAA<br>   | 1874 |
| KP025765      | 4851 | acatttgccccaccctcggcccagccttgggccagccgggcgtgggacaa      | 4900 |
| ENSOARG000000 | 1875 | TGGGCAAGGGTTCAGGAAAATCGAGGGGTGTAATCTGGGGTTAGGAGAG<br>   | 1924 |
| KP025765      | 4901 | tgggcaagggttcaggaaaatcgaggggtgtaaactctggggttaggagag     | 4950 |
| ENSOARG000000 | 1925 | CAGCGGGGACAGGCACGGCCCCCTGACCCCGTCTCCTTCTGGCCAGGTG<br>   | 1974 |
| KP025765      | 4951 | cagcggggacaggcacggccccctgaccccgctctccttctggccaggtg      | 5000 |
| ENSOARG000000 | 1975 | TTCAAGGAACGTCGCTGCAACACCCAGGCTGAGCTGCTGGCTGCCGGCTG<br>  | 2024 |
| KP025765      | 5001 | ttcaaggaacgtcgctgcaacacccaggctgagctgctggctgccggctg      | 5050 |
| ENSOARG000000 | 2025 | CCGGCTGCAGAGTGTGGTGGTTCATGGAGAGCAGCTACGAGATCATGGAGG<br> | 2074 |
| KP025765      | 5051 | ccggctgcagagtgtggtggtcatggagagcagctacgagatcatggagg      | 5100 |
| ENSOARG000000 | 2075 | TGCCCGGGGTTGGGGGTAGGGGGAGGCAAGCTCAAGGCCAGCTGCTTATG<br>  | 2124 |
| KP025765      | 5101 | tgcccgggggttgggggtagggggaggcaagctcaaggccagctgcttatg     | 5150 |
| ENSOARG000000 | 2125 | GGGTGTTATGGGGTCCCCTGGCTGAGCGGTCTCTCATTAGATCTGGAGA<br>   | 2174 |
| KP025765      | 5151 | gggtgttatgggggtcccctggctgagcggctctctcattagatctggaga     | 5200 |

|               |      |                                                         |      |
|---------------|------|---------------------------------------------------------|------|
| ENSOARG000000 | 2175 | GGCCCTCCAGCCAGCTGTCTCTCCCTTGGGCACAGGAAAGGCAGATCG<br>    | 2224 |
| KP025765      | 5201 | ggccctccagccagctgtcctcctcccttgggcacaggaaaggcagatcg      | 5250 |
| ENSOARG000000 | 2225 | ACACCACGCTGCGCCGAGCCAAGTGTCCCCTCAGGCACTGCGGGTGC GG<br>  | 2274 |
| KP025765      | 5251 | acaccacgctgcgccgagccaagtgtcccctcaggcactgcgggtgcgg       | 5300 |
| ENSOARG000000 | 2275 | CTGCGGCCGGGCGAGGAGCGGCACTTCGAGCTGCAGGTGTTT GAGCCCCT<br> | 2324 |
| KP025765      | 5301 | ctgcgccgggagaggagcggcacttcgagctgcaggtgtttgagcccct       | 5350 |
| ENSOARG000000 | 2325 | GGAGAGCCCCATGGACCTGTATATCCTCATGGACTTCTCCA ACTCCATGT<br> | 2374 |
| KP025765      | 5351 | ggagagccccatggacctgtatatcctcatggacttctccaactccatgt      | 5400 |
| ENSOARG000000 | 2375 | CTGATGATCTGGACAACCTCAAGAAGATGGGGCAGGATCTGGGTATGGAG<br>  | 2424 |
| KP025765      | 5401 | ctgatgatctggacaacctcaagaagatggggcaggatctgggtatggag      | 5450 |
| ENSOARG000000 | 2425 | AGGAAGACTGCGGGGCATGGAGAGGGTGCTCCCCACCCCCAGCTGCTCA<br>   | 2474 |
| KP025765      | 5451 | aggaagactgcgggcatggagaggggtgctccccacccccagctgctca       | 5500 |
| ENSOARG000000 | 2475 | GGAGGCCAGGGCTCAGGCTAGCTATACCCACTCCTCAAGAAAGGACAGGA<br>  | 2524 |
| KP025765      | 5501 | ggaggccagggtcaggctagctatacccactcctcaagaaaggacagga       | 5550 |
| ENSOARG000000 | 2525 | CTTCTGAGCACCCCAAGAACTCCTCCCCATTCTCAGAGGAGAGTCCTGGC<br>  | 2574 |
| KP025765      | 5551 | cttctgagcaccccaagaactcctccccattctcagaggagagtctctggc     | 5600 |
| ENSOARG000000 | 2575 | CAGACCCCCAGTAACCACTCAGCAGTACAGAGGAGGGCCCCACTGGGTGG<br>  | 2624 |
| KP025765      | 5601 | cagacccccagtaaccactcagcagtacagaggaggccccactgggtgg       | 5650 |
| ENSOARG000000 | 2625 | GCCCCAGACCCCCTCTGGTCCGTTTTTGGGTTTTTTGGCTGGACCGTGTCA<br> | 2674 |
| KP025765      | 5651 | gccccagacccccctctggtccgttttgggttttttggctggaccgtgtca     | 5700 |
| ENSOARG000000 | 2675 | CGTGGCTTGTGGGATCTTAATACCCTGACCAGGGGTCAAACCCGTGCCTC<br>  | 2724 |
| KP025765      | 5701 | cgtggcttgtgggatcttaataccctgaccagggtcaaaccctgcctc        | 5750 |
| ENSOARG000000 | 2725 | TGTAGTGGCAACCCAGAGTTCTAGCCATTGGACTGCCAGGAAATGCCCTC<br>  | 2774 |
| KP025765      | 5751 | tgtagtggcaaccagagttctagccattggactgccaggaaatgccctc       | 5800 |
| ENSOARG000000 | 2775 | CTCTGGTCCTGACAAGGAGGGTCCCGGCTGCTACGAGGCTGAGGTTAAGT<br>  | 2824 |
| KP025765      | 5801 | ctctggtcctgacaaggagggtcccggctgctacgaggctgaggttaagt      | 5850 |
| ENSOARG000000 | 2825 | CTGAGCTCAACAGATGTCTGGTCCAGCTCCCCACCCGCCCTCCA ACTT<br>   | 2874 |
| KP025765      | 5851 | ctgagctcaacagatgtctggtccagctccccacccgccccctccaactt      | 5900 |
| ENSOARG000000 | 2875 | GCTGCATGTGTGACTCCGGTCCCCTGAGTCCCATTCCCTTCATCTGTAA<br>   | 2924 |
| KP025765      | 5901 | gctgcatgtgtgactccgggtcccctgagtcccattcccttcactctgtaa     | 5950 |
| ENSOARG000000 | 2925 | ATAATGACAGGGCTGCTGTGTGCACCAACTGATGCCAAACATGCAAAGCG<br>  | 2974 |
| KP025765      | 5951 | ataatgacagggtgctgtgtgcaccaactgatgccaacatgcaaagcg        | 6000 |
| ENSOARG000000 | 2975 | TTGACGTTAAGTTATTAAGTTATTCTTCTTCTTCTTCTTCCCAAAC CAG<br>  | 3024 |

|               |      |                                                            |      |
|---------------|------|------------------------------------------------------------|------|
| KP025765      | 6001 | <br>ttgacgttaagttattaagttattcttcctcttcctccttcccaaacag      | 6050 |
| ENSOARG000000 | 3025 | CCCCAACACTTATGTGGATGTGGGGTTCTTGGGGCTCAGCTGCCCTTTC<br>      | 3074 |
| KP025765      | 6051 | cccccaacacttatgtggatgtggggttcttggggctcagctgccctttc         | 6100 |
| ENSOARG000000 | 3075 | TTTTTGTTTTTAAAAAGTTTATTTATTTTAAATTGAAGGATATTGCTTCA<br>     | 3124 |
| KP025765      | 6101 | tttttgtttttaaaaagtttatttttttaattgaaggatattgcttta           | 6150 |
| ENSOARG000000 | 3125 | CAACATTGCATTGGTTTCCGCCATACACCAACATGAATCAGCCGTAGGTG<br>     | 3174 |
| KP025765      | 6151 | caacattgcattggtttccgccatacaccaacatgaatcagccgtagggtg        | 6200 |
| ENSOARG000000 | 3175 | TACATATGACCCCTCCCTCTTGAAGCCCTCCACCTCCCACCCATCCC<br>        | 3224 |
| KP025765      | 6201 | tacatatgacccctccctcttgaagccctccacctcccaccatccc             | 6250 |
| ENSOARG000000 | 3225 | ACCCTTCGAGGCTGTCCCAGAGCTGCCGGAGTTGAGGCCCTGAGCCACA<br>      | 3274 |
| KP025765      | 6251 | acccttcgaggctgtcccagagctgccggagttgaggccctgagccaca          | 6300 |
| ENSOARG000000 | 3275 | CAGCGAATCCCCGGCTACTATTTTACACATGGCAGCGTGTCTGCTTCTG<br>      | 3324 |
| KP025765      | 6301 | cagcgaatccccggctactattttacacatggcagcgtgtctgcttctg          | 6350 |
| ENSOARG000000 | 3325 | TGCTACTCTCCGTCAATCCCACCCACAGCTGCCCCGTCTTTCCTACTGA<br>      | 3374 |
| KP025765      | 6351 | tgctactctccgtcaatcccaccacagctgccccgtctttcctactga           | 6400 |
| ENSOARG000000 | 3375 | TGCCCAGCTCAGGTCTAAGGCAGCTCACCAGCGACTACACTATAGGATT<br>      | 3424 |
| KP025765      | 6401 | tgcccagctcaggtcctaaggcagctcaccagcgactacactataggatt         | 6450 |
| ENSOARG000000 | 3425 | TGGCAAGTTCGTGGACAAAAGTCAGCGTCCCTCAGACGGACATGAGGCCTG<br>    | 3474 |
| KP025765      | 6451 | tggcaagttcgtggacaaaagtcagcgtccctcagacggacatgaggcctg        | 6500 |
| ENSOARG000000 | 3475 | AGAAGTGAGTGATCTACCAAGTAGACGGGGTCTTGGCCAGGTGGCCAC<br>       | 3524 |
| KP025765      | 6501 | agaagtgagtgatctaccaagtagacgggggtcctggccaggtggccac          | 6550 |
| ENSOARG000000 | 3525 | CTCCTCTCCACCCAGGCACTTTGAAAATCTTGGGGTTACTGAGCCAAG<br>       | 3574 |
| KP025765      | 6551 | ctcctctccaccaggcactttgaaaatcttggggttactgagccaag            | 6600 |
| ENSOARG000000 | 3575 | GGGTGGTCCGCAAGGAGGGTGGGCGCGGGCATGGGGTCTTCTTCCCTG<br>       | 3624 |
| KP025765      | 6601 | gggtggtccgcaaggagggtgggcgcgggcatgggggtcttcttccctg          | 6650 |
| ENSOARG000000 | 3625 | ACTTTCTCTCTCCGTGATGCTCCCTTCCCACCTTCCCAGGCTGAAGGAA<br>      | 3674 |
| KP025765      | 6651 | actttctctctccgtgatgctcccttcccaccttcccaggctgaaggaa          | 6700 |
| ENSOARG000000 | 3675 | CCCTGGCCCAACAGTGATCCCCCTTCTCCTTCAAGAATGTCATCAGTCT<br>      | 3724 |
| KP025765      | 6701 | ccctggcccaacagtgatcccccttctccttcaagaatgtcatcagcct          | 6750 |
| ENSOARG000000 | 3725 | GACAGAAGACGTGGAGGAGTTCCGGAACAAGCTGAAGGGGAGCGCATCT<br>   .  | 3774 |
| KP025765      | 6751 | gacggaagacgtggaggagtccggaacaagctgaaggggagcgcacatct         | 6800 |
| ENSOARG000000 | 3775 | CAGGCAATCTGGATGCCCCGAAGGAGTTTTGATGCCATCCTGCAGACA<br>     . | 3824 |

|               |      |                                                     |      |
|---------------|------|-----------------------------------------------------|------|
| KP025765      | 6801 | caggcaacctggatgccccgaaggaggttttgatgccatcctgcagaca   | 6850 |
| ENSOARG000000 | 3825 | GCCGTGTGCACCGTGAGTGCGGGGAGGCTCCTTCCGTTCTAGACCAGGGC  | 3874 |
| KP025765      | 6851 | gccgtgtgcaccgtgagtgcggggaggctccttccgttctagaccagggc  | 6900 |
| ENSOARG000000 | 3875 | TGTGTCAAGAGCTGCCCCCTGGCCTGCTCTGGTGCCAAGCTGGGGCCCC   | 3924 |
| KP025765      | 6901 | tgtgtcaagagctgccccctggcctgctctggtgccaagctggggcccc   | 6950 |
| ENSOARG000000 | 3925 | ATGCTCTCAGACAAGCTCAGACCCTCTGGGGGACCCTCAATTCCAATCCA  | 3974 |
| KP025765      | 6951 | atgctctcagacaagctcagaccctctgggggaccctcaattccaatcca  | 7000 |
| ENSOARG000000 | 3975 | AGTTTAGAGGTGTTGGGGCCTGAGCAGTCTTACCCTGCTTTTGTATTGGT  | 4024 |
| KP025765      | 7001 | agtttagaggtgttggggcctgagcagtcttaccctgcttttgtattggt  | 7050 |
| ENSOARG000000 | 4025 | CACCAAGGTGGACCTGAGCCTCGGCGTTCTGGAATCTTCAGTGCCCCGAG  | 4074 |
| KP025765      | 7051 | caccaaggtggacctgagcctcggcgttctggaatcttcagtgccccgag  | 7100 |
| ENSOARG000000 | 4075 | CCCCAAGCTCCCTGCTAATACCCATCTCCAGCTGTGCTAGAAGAGGGCAC  | 4124 |
| KP025765      | 7101 | ccccaaagctccctgctaatacccatctccagctgtgctagaagaggcac  | 7150 |
| ENSOARG000000 | 4125 | TTTTTACGTGCACATCAATTTTTTTCATTTAAAAAATAATGCACTGATGTT | 4174 |
| KP025765      | 7151 | tttttacgtgcacatcaattttttcatttaaaaaataatgcaactgatggt | 7200 |
| ENSOARG000000 | 4175 | ATAGACAATTTGGAAAACAAAGAACAGAAATTGCCATAATTCCACCACC   | 4224 |
| KP025765      | 7201 | atagacaatttgaaaaaacaagaacagaaattgcccataattctaccacc  | 7250 |
| ENSOARG000000 | 4225 | ATCACAGAGACAGCTGCCTGATACCCCGGCAGCGTGTACTGTTCCCTTGT  | 4274 |
| KP025765      | 7251 | atcacagagacagctgcctgataccccggcagcgtgtactgttcccttgt  | 7300 |
| ENSOARG000000 | 4275 | GTAGTCGAAATCAGTGACGTTATATTCTGCCCTTCTTTCCCCAACCT     | 4324 |
| KP025765      | 7301 | gtagtcgaaatcagtgacgttatattctgcccttctttcccccaacct    | 7350 |
| ENSOARG000000 | 4325 | ATTGCTTTTATAAACATGGTTTGCAAACCACCCTATATATTCTCAAAC    | 4374 |
| KP025765      | 7351 | attgcttttataaacatggtttgcaaaccaccctatatatttctcaaac   | 7400 |
| ENSOARG000000 | 4375 | AAATGGCCATGCGCTGCTGTCCCTGTTTTAAGTCTCTTGTGAACGTTGG   | 4424 |
| KP025765      | 7401 | aatggccatgcgctgctgtccctgttttaagtctcttgttgaacgttgg   | 7450 |
| ENSOARG000000 | 4425 | CGTGGTGTCCGTTTTTCTATGCAGTTGAGAGATGCTTGCAGAGTGATTGA  | 4474 |
| KP025765      | 7451 | cgtggtgtccgtttttctatgcagttgagagatgcttgcagagtgattga  | 7500 |
| ENSOARG000000 | 4475 | GACCTTGAGGGGACAGCTGGCTGAAACTGGCTCCCATCTTGCCTGGTGCC  | 4524 |
| KP025765      | 7501 | gaccttgaggggacagctggctgaaactggctcccatcttgcgtggtgcc  | 7550 |
| ENSOARG000000 | 4525 | CGCTGTGGGCACCATCCCTGCGTCCATTTCTGCTCCCCATGGCTGGTTT   | 4574 |
| KP025765      | 7551 | cgctgtgggcaccatccctgctccatttctgctccccatggctggttt    | 7600 |
| ENSOARG000000 | 4575 | CTGTGCCCCCTCCCCACCCGGTTCATCCTCCCGGCGCTGTTTGTGATGAG  | 4624 |
| KP025765      | 7601 | ctgtgccccctccccacccgggtcatcctcccggcgtgtttgtcatgag   | 7650 |

|               |      |                                                     |      |
|---------------|------|-----------------------------------------------------|------|
| ENSOARG000000 | 4625 | CGTTGCTCACAGAGGCTGTGAATCCCGAGTCCTTGCTGAGCACCGCGTTG  | 4674 |
|               |      |                                                     |      |
| KP025765      | 7651 | cgttgctcacagaggctgtgaatcccgagtccttgctgagcaccgcgttg  | 7700 |
| ENSOARG000000 | 4675 | GGACCCGCCTTCGCTGTGATGGTGCGTGGCGCTGTGACGTTGCCGTCAGC  | 4724 |
|               |      |                                                     |      |
| KP025765      | 7701 | ggacccgccttcgctgtgatggctgctggcgctgtgacgttgccgtcagc  | 7750 |
| ENSOARG000000 | 4725 | AGGCTGCCTGCTCCACGGGCACCCACTCCTTGCTCTCCCCAGAGGGACAT  | 4774 |
|               |      |                                                     |      |
| KP025765      | 7751 | aggctgcctgctccacgggcacccccctccttgctctccccagagggacat | 7800 |
| ENSOARG000000 | 4775 | CGGCTGGCGCCCTGACAG-----                             | 4792 |
|               |      |                                                     |      |
| KP025765      | 7801 | cggctggcgccctgacagcaccacttgctggtgttctccaccgagtcgg   | 7850 |
| ENSOARG000000 | 4793 | -----                                               | 4792 |
| KP025765      | 7851 | ccttccactacgaggccgacggggccaacgtgctggccggcatcatgagg  | 7900 |
| ENSOARG000000 | 4793 | -----                                               | 4792 |
| KP025765      | 7901 | cgtaacgacgaggagtgcacactggacccacgggcacctacactcagta   | 7950 |
| ENSOARG000000 | 4793 | --AGATGCAGGACTACCCGTCCGTGCCACCCCTGGTGCGCCTGCTCGGCC  | 4840 |
|               |      |                                                     |      |
| KP025765      | 7951 | caagatgcaggactaccctcggtgcccaccctggtgctgcctgctcggcc  | 8000 |
| ENSOARG000000 | 4841 | AGCACAACATCATCCCCATCTTCGCCGTCACCAACTACTCCTATAGCTAC  | 4890 |
|               |      |                                                     |      |
| KP025765      | 8001 | agcacaacatcatccccatcttcgccgtcaccaactactcctatagctac  | 8050 |
| ENSOARG000000 | 4891 | TACGAGGTGCGGGGCTGGGCCTCCCTGGGCTCGGGGGAGGGACCCACGGA  | 4940 |
|               |      |                                                     |      |
| KP025765      | 8051 | tacgaggtgctggggctgggcctccctgggctcgggggagggaccacgga  | 8100 |
| ENSOARG000000 | 4941 | ACTTCTCAGACACACCCCCACCCCTCCTTTCTTCTTCCGAAACTTCA     | 4990 |
|               |      |                                                     |      |
| KP025765      | 8101 | acttctcagacacacccccaccctcctttccttcttccgaaacttca     | 8150 |
| ENSOARG000000 | 4991 | GATGGGCCCTGGTGGGAAGAGCGGTCATGTGCCATCCTCTGACCCAC     | 5040 |
|               |      |                                                     |      |
| KP025765      | 8151 | gatgggccctggtgggaagaggcggatcatgtgccatcctctgacccac   | 8200 |
| ENSOARG000000 | 5041 | TCCCCAGCAGGCAGGAGCTGAGAGCGTCCCCACCCGCCCCCAAACCCC    | 5090 |
|               |      |                                                     |      |
| KP025765      | 8201 | tccccagcaggcaggagctgagagcgtccccaccg-----caaa---     | 8241 |
| ENSOARG000000 | 5091 | CCCCACCAAAGGGCAGGTGAGCCCCAGAGCTCCCGTCTGGATCCGGAGC   | 5140 |
|               |      | .                                                   |      |
| KP025765      | 8242 | -----gcgggtgagccccagagctcccgtctggatccggagc          | 8278 |
| ENSOARG000000 | 5141 | GATGGCCCCCGTCAGAGGCTGAGCCCCGGGCCCGGCTTTCTCTCCCGCAG  | 5190 |
|               |      |                                                     |      |
| KP025765      | 8279 | gatggcccccgctcagaggctgagccccgggcccggctttctctcccgag  | 8328 |
| ENSOARG000000 | 5191 | AGGCTGTGCTCTATTTCCCGTCTCCTCACTGGGGGTGCTGCAGGAGGA    | 5240 |
|               |      |                                                     |      |
| KP025765      | 8329 | aggctgtcgtcctatTTCCCGTCTCCTCACTGGGGGTGCTGCAGGAGGA   | 8378 |
| ENSOARG000000 | 5241 | CTCGTCCAACATTGTGATCTGCTGCAGGAAGCCTTCAACGTGAGGGCCA   | 5290 |
|               |      |                                                     |      |
| KP025765      | 8379 | ctcgtccaacattgtcgatctgctgcaggaagccttcaacgtgaggcca   | 8428 |

|               |      |                                                     |      |
|---------------|------|-----------------------------------------------------|------|
| ENSOARG000000 | 5291 | GTGCGGGCTGCGGGC-----                                | 5305 |
|               |      |                                                     |      |
| KP025765      | 8429 | gtgcgggctgcgggccccgagggtggcggggtggcgggagagatggccg   | 8478 |
| ENSOARG000000 | 5306 | -----CAGAGGATGGGGAACTGGATGGGAGGGCGGAAGGGCCTCCTGCG   | 5350 |
|               |      |                                                     |      |
| KP025765      | 8479 | gaagacagaggatggggaaactggatgggagggcggaaggcctcctgcg   | 8528 |
| ENSOARG000000 | 5351 | GTCCCTGAGGAGCCCCGGGCTGGCCCCAGGCTCCTGCAGGCTCTGCTC    | 5400 |
|               |      |                                                     |      |
| KP025765      | 8529 | gtccctgaggagccccgggctggccccaggctcctgcaggctctgctc    | 8578 |
| ENSOARG000000 | 5401 | CCATGAGCCCCGGCACCCAGGCCTCCGTGCAGGTAAGGCTGCAGCTCAG   | 5450 |
|               |      |                                                     |      |
| KP025765      | 8579 | ccatgagccccggcaccaggcctcctgagtaaggctgcagctcag       | 8628 |
| ENSOARG000000 | 5451 | GCAGCCAGGCCGACGCGGGCTGGCCCCACCTCCCAGGTCATCGA        | 5500 |
|               |      |                                                     |      |
| KP025765      | 8629 | gcagccaggccgcagcgggaggtctgggccccacctccaggtcatcga    | 8678 |
| ENSOARG000000 | 5501 | TAACTGCCCCCTTTCAGCGCATCCGCTCCAACCTGGACATTCGGGCCCT   | 5550 |
|               |      |                                                     |      |
| KP025765      | 8679 | taacctgccccctttcagcgcacccgctccaacctggacattcgggcct   | 8728 |
| ENSOARG000000 | 5551 | GGACAGTCCTCGAGGCCTGCGGACAGAGGTCACCTCTAGGATGTTCCAGA  | 5600 |
|               |      |                                                     |      |
| KP025765      | 8729 | ggacagtcctcgaggcctgaggacagaggtcacctctaggatgttcaga   | 8778 |
| ENSOARG000000 | 5601 | AGACGGACACGGGGTCTTTTTCATCCGGCGAGGGGAAGTGGTATGCCTC   | 5650 |
|               |      |                                                     |      |
| KP025765      | 8779 | agacggacacggggtccttttcatccggcgagggaagtggatgcctc     | 8828 |
| ENSOARG000000 | 5651 | CATGGGGGCCCGAGAGACGGGAGGATGGGGACAGCACCTGTGGGTGG     | 5700 |
|               |      |                                                     |      |
| KP025765      | 8829 | catgggggccccgagagaggggaggatggggacagcaccctgtgggtgg   | 8878 |
| ENSOARG000000 | 5701 | GGTCTACCCAAACAGAGATCCAGAGCGTGGCCTCCCGAGTCAGACAGATC  | 5750 |
|               |      |                                                     |      |
| KP025765      | 8879 | ggtctacccaaacagagatccagagcgtggcctcccgagtcagacagatc  | 8928 |
| ENSOARG000000 | 5751 | TGGGTTTGAAGCCCCCTGGAGCAGCCTCTTGCTGAGCTCTGCCCTGCC    | 5800 |
|               |      |                                                     |      |
| KP025765      | 8929 | tgggtttgaagccccctggagcagcctcttgctgagctctgcctgcc     | 8978 |
| ENSOARG000000 | 5801 | TTGGTTGGTGCTCAGCTGTAAAGCGGAGATCAGTCAGCATGGAGCCAGG   | 5850 |
|               |      |                                                     |      |
| KP025765      | 8979 | ttggttggctcagctgtaaagcggagatcagtcagcatggagcccagg    | 9028 |
| ENSOARG000000 | 5851 | TTGCTCAGCTGAACGAGCGGGCCGAAGGCAGCTCTGCTTACTGTGGGCT   | 5900 |
|               |      |                                                     |      |
| KP025765      | 9029 | ttgctcagctgaacgagcgggcccgaaggcagctctgcttactgtcgggct | 9078 |
| ENSOARG000000 | 5901 | CTTGTTATCTGACTCTGCCTGGAGGAAGCGAGTTGGCAGCCCTGAGGAA   | 5950 |
|               |      |                                                     |      |
| KP025765      | 9079 | cttgttatcctgactctgcctggaggaagcagttggcagccctgaggaa   | 9128 |
| ENSOARG000000 | 5951 | GGACGGGCAAGGAGCTGGGTGGCAGGGCCAGACACATTTCTGAAGCTTT   | 6000 |
|               |      |                                                     |      |
| KP025765      | 9129 | ggacgggcaaggagctgggtggcagggccagacacatttctgaagcttt   | 9178 |
| ENSOARG000000 | 6001 | AGGGCTGAGAGCTTTCAGGTAGAACTGCCATCCCAGCTGGTCCAGCTGGG  | 6050 |
|               |      |                                                     |      |
| KP025765      | 9179 | agggctgagagctttcaggtagaactgccatcccagctggtccagctggg  | 9228 |
| ENSOARG000000 | 6051 | CCTGCCTCGGCTAAAAGCGGGTCTTGCAGGGCACATAACCAAGTGCAGC   | 6100 |



|               |                                                          |       |  |
|---------------|----------------------------------------------------------|-------|--|
|               |                                                          |       |  |
| KP025765      | 9229 cctgcctcggctaaaagcggggctccttgcagggcacataccaagtgcagc | 9278  |  |
| ENSOARG000000 | 6101 TGC GGGCCATCGAGGACTTGATGGGGCTCATGTGTGCCAGCTGCCGAG   | 6150  |  |
|               |                                                          |       |  |
| KP025765      | 9279 tgcgggccatcgaggacttggatggggctcatgtgtgccagctgccggag  | 9328  |  |
| ENSOARG000000 | 6151 GCAGACCAGAAGGGCACCATCCATCTGAAGCCATCCTTCTCCAACGGCCT  | 6200  |  |
|               |                                                          |       |  |
| KP025765      | 9329 gcagaccagaagggcaccatccatctgaagccatccttctccaacggcct  | 9378  |  |
| ENSOARG000000 | 6201 CCGGATGGATGTGGGCGTCATCTGTGACGTGTGCTCCTGTGAGCTGGTAT  | 6250  |  |
|               |                                                          |       |  |
| KP025765      | 9379 ccggatggatgtgggctcatctgtgacgtgtgctcctgtgagctggtat   | 9428  |  |
| ENSOARG000000 | 6251 GACACAGCCCTGCCAGGGGCGCGGGCAGGGAAAGGCTAAGCTGACCAC    | 6300  |  |
|               |                                                          |       |  |
| KP025765      | 9429 gacacagccctgcccaggggctggggcagggaaaggctaagctgaccac   | 9478  |  |
| ENSOARG000000 | 6301 CCGGGGACCCGAGTAACAAAGCAGAGCTCCCTTTTCGGGGTGTGGCAAG   | 6350  |  |
|               |                                                          |       |  |
| KP025765      | 9479 ccggggacccgagtaacaaagcagagctcccttttcggggctgctggcaag | 9528  |  |
| ENSOARG000000 | 6351 CATCTCCTGCCCTTCCCCACCCACCTCACCACGATTTTATTCCAGCAAA   | 6400  |  |
|               |                                                          |       |  |
| KP025765      | 9529 catctcctgccccttccccaccacctcaccacgatttcattccagcaaa   | 9578  |  |
| ENSOARG000000 | 6401 AAGAGGAGCGGTCATCTCGCTGCAGCTTCCACGGGGACTTCATGTGCGGA  | 6450  |  |
|               |                                                          |       |  |
| KP025765      | 9579 aagaggagcggctcatctcgctgcagcttccacggggacttcatgtgcgga | 9628  |  |
| ENSOARG000000 | 6451 CACTGTGTGTGCCATGAGGGCTGGTAAGTGTGGAGGGGTGAAGCCGGCA   | 6500  |  |
|               |                                                          |       |  |
| KP025765      | 9629 cactgtgtgtgccatgagggtggtaagtgtggaggggtgaagccggca    | 9678  |  |
| ENSOARG000000 | 6501 CCCAGGATGCCAGCAGCTCCCAGTGAAGGGGCTGCAAGCGCTTGACACT   | 6550  |  |
|               |                                                          |       |  |
| KP025765      | 9679 cccaggatgccagcagctcccagtgaaagggcctgcaagcgcttgacct   | 9728  |  |
| ENSOARG000000 | 6551 GGGCATAACCATGGAGGCAGGCTGAGGAGAGGGTGGCAGCCGGGCATAGAA | 6600  |  |
|               |                                                          |       |  |
| KP025765      | 9729 gggcataccatggaggcaggctgaggagagggtggcagccgggcatagaa  | 9778  |  |
| ENSOARG000000 | 6601 AAGGCTGAGAAAGGGGCACATCCAGTTGGTGGATTAATTCAAAGCACTT   | 6650  |  |
|               |                                                          |       |  |
| KP025765      | 9779 aaggctgagaaaggggcacatccagttggtggattaaattcaaacactt   | 9828  |  |
| ENSOARG000000 | 6651 TGAAAAACATGGGTTTGGGAATTCCTGATGGTCCAGTGGTTAGGACTTG   | 6700  |  |
|               |                                                          |       |  |
| KP025765      | 9829 tgaaaaacatgggtttgggaattccctgatggtccagtggttaggacttg  | 9878  |  |
| ENSOARG000000 | 6701 GTGTTCTCATGGCTGGAGCTGTGGGTTTATTCCCTGATCAGGAACTTAA   | 6750  |  |
|               |                                                          |       |  |
| KP025765      | 9879 gtgttctcatggctggagctgtgggttcattccctgatcaggaaacttaa  | 9928  |  |
| ENSOARG000000 | 6751 GATCCTGCAAGCTATCCAGTGCAACAACCCACCCCTCCTCCCCACCC     | 6800  |  |
|               |                                                          |       |  |
| KP025765      | 9929 gatcttgcaagctatccagtgcaacaacccca-cccctcctccccacc    | 9977  |  |
| ENSOARG000000 | 6801 CCACAAAAAAAAAAAAACAAACCCTGGATAATTCTTGAAAAATACCTTG   | 6850  |  |
|               | .                                                        |       |  |
| KP025765      | 9978 ccgc-aaaaaaaaaacaaccctggataattcttgaaaaataccttg      | 10026 |  |
| ENSOARG000000 | 6851 GTATATTGGATTATCTCTGAAAGTCATTTAAGAATCAGGACGGTGGCCA   | 6900  |  |
|               |                                                          |       |  |

KP025765 10027 gtatattggattatctctgaaagtcatttaagaatcaggacggtggcca 10076  
 ENSOARG000000 6901 TCAGGGTCTTGTGGGTGAGCAGAGGGGAAGCTGACTTTGCCCTCCATC 6950  
 ||||||||||||||||||||||||||||||||||||||||||||||||||||||||  
 KP025765 10077 tcagggtcttgtgggtcaggcagagggggaagctgactttgccctccatc 10126  
 ENSOARG000000 6951 CCTTTTGAACCTTTAGTATCTGAGCCATCCTGGAGAAGGAAATGGCTACC 7000  
 ||||||||||||||||||||||||||||||||||||||||||||||||||||||||  
 KP025765 10127 ccttttgaaccttttagtatctgagccatcctggagaaggaaatggctacc 10176  
 ENSOARG000000 7001 CGCTCCAGTATTCTTGCCTGGAAAAATCCCATGGACAAAGGAGCCTGGTG 7050  
 |.||||||||||||||||||||||||||||||||||||||||||||||||||||||  
 KP025765 10177 cactccagtattcttgcctggaaaaatcccatggacaaaggagcctggtg 10226  
 ENSOARG000000 7051 GGCTACAGTCCATGGAGGTGCAAAGAGTCGGACACGACTGAGCACACAGC 7100  
 ||||||||||||||||||||||||||||||||||||||||||||||||||||||||  
 KP025765 10227 ggctacagtccatggaggtgcaaagagtcggacacgactgagcacacagc 10276  
 ENSOARG000000 7101 ACATTTGAGCCATGGGCCCTATTCCCTGAGCAGAAGTGAGTCATGGATG 7150  
 ||||||||||||||||||||||||||||||||||||||||||||||||||||||||  
 KP025765 10277 acatttgagccatgggcccctattccctgagcagaagtgagtcatggatg 10326  
 ENSOARG000000 7151 AGTGATAGTAAGAGTAAGGGCTTTTCAAGCTTCAAGACACTCAACAGATT 7200  
 ||||||||||||||||||||||||||||||||||||||||||||||||||||||||  
 KP025765 10327 agtgatagtaagagtaagggtctttcaagcttcaagacactcaacagatt 10376  
 ENSOARG000000 7201 TGTCGTGACTTGAGGGGACAGAGGGAGGGTCTCAGGGAAGTGGGTTTGA 7250  
 ||||||||||||||||||||||||||||||||||||||||||||||||||||||||  
 KP025765 10377 tgtcgtgacttgaggggacagagggagggtctcaggaactgaggtttga 10426  
 ENSOARG000000 7251 GTTCAGTTCAACCACTGCTGTCTGCTTAACTTAGACCCATTTAGAGCCTC 7300  
 ||||||||||||||||||||||||||||||||||||||||||||||||||||||||  
 KP025765 10427 gttcagttcaaccactgctgtctgcttaacttagaccatttagagcctc 10476  
 ENSOARG000000 7301 AGTTTCCTCATCTGTAAAATGGGATGGTGAAGGCCAGCCTTCTTGCTGG 7350  
 ||||||||||||||||||||||||||||||||||||||||||||||||||||||||  
 KP025765 10477 agtttcctcatctgtaaaatgggatgggtgaaggcccagccttcttgctgg 10526  
 ENSOARG000000 7351 GCAGTGGGGAAGTACTGGCTCCTCCTGCAGGAGCGGCAAGACCTGTAAC 7400  
 ||||||||||||||||||||||||||||||||||||||||||||||||||||||||  
 KP025765 10527 gcagtggggaagtgactggctcctcctgcaggagcggcaagacctgtaac 10576  
 ENSOARG000000 7401 TGCTCCACCGGCTCCCAGAGCGACCTGCAGCCCTGCCGGCGGGAGGGCGA 7450  
 ||||||||||||||||||||||||||||||||||||||||||||||||||||||||  
 KP025765 10577 tgctccaccggctcccagagcgacctgcagccctgccggcgggagggcga 10626  
 ENSOARG000000 7451 GGACAAGGTGTGCTCCGGGCGGGCGAATGCCAGTGTGGCCACTGTGTGT 7500  
 ||||||||||||||||||||||||||||||||||||||||||||||||||||||||  
 KP025765 10627 ggacaaggtgtgctccgggCGGGCGAATGCCAGTGTGGCCACTGTGTGT 10676  
 ENSOARG000000 7501 GCTACGGCGAAGGCCGCTACGAGGGTCAGTTCTGTGAATATGACAACTTC 7550  
 ||||||||||||||||||||||||||||||||||||||||||||||||||||||||  
 KP025765 10677 gctacggcgaaggccgctacgagggtcagttctgtgaatatgacaacttc 10726  
 ENSOARG000000 7551 CAGTGTCCCCGCACCTCTGGGTTCTCTGCAATGGTAAGCTGCTGACCTG 7600  
 ||||||||||||||||||||||||||||||||||||||||||||||||||||||||  
 KP025765 10727 cagtgtccccgcacctctgggttcctctgcaatggtaagctgctgacctg 10776  
 ENSOARG000000 7601 AGTGGGGTGGCACGGGGCTTTGGGGTGGCTGGGTGCCAGCCCACACC 7650  
 ||||||||||||||||||||||||||||||||||||||||||||||||||||||||  
 KP025765 10777 agtgggggtggcacggggctttgggggtggcctgggtgcccagcccacacc 10826  
 ENSOARG000000 7651 CTGCCCTGCTGGCTCTCCCATCAGAGCCCAAGTAGGGAGAGCCACACCAG 7700  
 |||||||.||||||||||||||||||||||||||||||||||||||||||||||  
 KP025765 10827 ctgccccgctggctctcccatcagagcccaagtagggagagccacaccag 10876

|               |       |                                                     |       |
|---------------|-------|-----------------------------------------------------|-------|
| ENSOARG000000 | 7701  | GAGTCAGAATCCCCACGTCCAGGCCTAGCCCTCCTCCAGATTCCCTGAGT  | 7750  |
|               |       |                                                     |       |
| KP025765      | 10877 | gagtcagaatccccacgtccaggcctagccctcctccagattccctgagt  | 10926 |
| ENSOARG000000 | 7751  | GCCGCCCCCAAGTCCAGCCCCAACCTGGACCTCTCTCCTCCAAAACTTG   | 7800  |
|               |       |                                                     |       |
| KP025765      | 10927 | gccgcccccaagtccagccccaacctggacctctctcctccaaaaacttg  | 10976 |
| ENSOARG000000 | 7801  | ATGCCCAAGGCCCTACCAGCATGACATTACCCTTATGTTTAAGACTCTG   | 7850  |
|               |       |                                                     |       |
| KP025765      | 10977 | atgcccaaggccccctaccagcatgacattacccttatgtttaagactctg | 11026 |
| ENSOARG000000 | 7851  | GCTTCCCTGAGGTCTCCAGTCCATGCCACCTTCTTTTCCACTCTCCA     | 7900  |
|               |       | .                                                   |       |
| KP025765      | 11027 | gctcccctgaggtcctccagtccatgccaccttcttttccactctcca    | 11076 |
| ENSOARG000000 | 7901  | TCCCCTAGGGTGGTACTACCCAGCTCGGTCTCAGGGATTGGTGCTATA    | 7950  |
|               |       |                                                     |       |
| KP025765      | 11077 | tcccacta-ggtgggtactaccagctcgggtctcagggattggtgctata  | 11125 |
| ENSOARG000000 | 7951  | AGGCATGGTGATCTTTCCTCTTTGGAAGGTGCTACATCTCTGGCAGGCA   | 8000  |
|               |       |                                                     |       |
| KP025765      | 11126 | aggcatggtgatctttcctctcttgaaggtgctacatctctggcaggca   | 11175 |
| ENSOARG000000 | 8001  | GGGCCTGGGGTAATGCATCCCACAGGGCCCAACACAGTGTGGGTCCAGGC  | 8050  |
|               |       |                                                     |       |
| KP025765      | 11176 | gggcctggggtaatgcatcccacagggcccaacacagtgtgggtccaggc  | 11225 |
| ENSOARG000000 | 8051  | CAGGGCCTATAGGCTGGCCAGAGCTTCTGGAAGTGGCAAGGGCCACAG    | 8100  |
|               |       |                                                     |       |
| KP025765      | 11226 | cagggcctataggctggccagagcttctggaactgggcaagggccacag   | 11275 |
| ENSOARG000000 | 8101  | AACCCATAGGGGCCACAGGAAGGACTGACTGGGTAATGGAGGAGGTTG    | 8150  |
|               |       |                                                     |       |
| KP025765      | 11276 | aaccataggggccacaggaaggactgactgggtaaatggaggaggttg    | 11325 |
| ENSOARG000000 | 8151  | AATGAAAATCCACTCACCAAATACTTATTAATCCCAACTGTATACTTGC   | 8200  |
|               |       |                                                     |       |
| KP025765      | 11326 | aatgaaaatccactaccaaatacttattaatcccaactgtatacttgc    | 11375 |
| ENSOARG000000 | 8201  | CGCTGGGGTCTACTCTTTCCTTCATTCTTGCTTTTATCTGCCTTCTCTT   | 8250  |
|               |       |                                                     |       |
| KP025765      | 11376 | cgctgggggtctactctttccttcattcttgcttttatctgccttctctt  | 11425 |
| ENSOARG000000 | 8251  | CTCTTTACCTGCCTACCCACAGTGTACTCAGAGAAATGAAGGGAGAACC   | 8300  |
|               |       |                                                     |       |
| KP025765      | 11426 | ctctttacctgcctaccacagtgactcagagaaatgaagggagaacc     | 11475 |
| ENSOARG000000 | 8301  | CAGGATGTCTGGAGAAAGACAGGTATTTAGCACAGGTGGAGCCATGAGAT  | 8350  |
|               |       |                                                     |       |
| KP025765      | 11476 | caggatgtctggagaaagacaggtatntagcacaggtggagccatgagat  | 11525 |
| ENSOARG000000 | 8351  | AGGAAGGGAGGGAGATGCTGCTGGAAGGAGGCAGGGCCAGAGTGTGAGG   | 8400  |
|               |       |                                                     |       |
| KP025765      | 11526 | aggaagggagggagatgctgctggaaaggaggcagggccagagtgtgagg  | 11575 |
| ENSOARG000000 | 8401  | GGTTTGGATTCCAGGCCAGGATGTACCAGTTTTAGCCTAGTCCACACTTT  | 8450  |
|               |       |                                                     |       |
| KP025765      | 11576 | ggtttggattccagggcaggatgtaccagttttagcctagtccacacttt  | 11625 |
| ENSOARG000000 | 8451  | TTCTTAAAGGGCCAGACATTAATGTTTTAGTTTTGTAAGCCAAACCAT    | 8500  |
|               |       |                                                     |       |
| KP025765      | 11626 | ttcttaaagggccagacattaaatgttttcagttttgtaagccaaacat   | 11675 |

|               |       |                                                     |       |
|---------------|-------|-----------------------------------------------------|-------|
| ENSOARG000000 | 8501  | TTCTATCACTACTACTCAGCTCTGCCGTTGTAGCAGAAAGCAGCTATAAG  | 8550  |
|               |       |                                                     |       |
| KP025765      | 11676 | ttctatcactactactcagctctgccgttgtagcagaaagcagctataag  | 11725 |
| ENSOARG000000 | 8551  | CAATACGGAAGCAAACGAGTGTGGCTCTGTTCCAGTAACACTTTTGCAA   | 8600  |
|               |       |                                                     |       |
| KP025765      | 11726 | caatacgaagcaaacgagtgtggctctgttccagtcacacttttgcaa    | 11775 |
| ENSOARG000000 | 8601  | AGCAGATGGTGAGCTGGATTTGGCCTGCAGGCTGTTAGTCAACCCCTATT  | 8650  |
|               |       | .                                                   |       |
| KP025765      | 11776 | agcaggtggtgagctggatttggcctgcaggctgttattcaaccctatt   | 11825 |
| ENSOARG000000 | 8651  | GTAGCAATGATATTGGACTTTATCCTTTGGGCAAAGGGAATCATTGGAGG  | 8700  |
|               |       |                                                     |       |
| KP025765      | 11826 | gtagcaatgatattggactttatcctttgggcaaagggaatcattggagg  | 11875 |
| ENSOARG000000 | 8701  | TTTTAATTTCAATTTCTCTTTATATGTTAACTTTGTATCCAGCCACCTTG  | 8750  |
|               |       |                                                     |       |
| KP025765      | 11876 | ttttaatttcattttctctttatagtttaactttgtatccagccaccttg  | 11925 |
| ENSOARG000000 | 8751  | CTCAACTAACTTATGAAACCTAGTAACTTATCTATAGATTCTTCTTGCTA  | 8800  |
|               |       |                                                     |       |
| KP025765      | 11926 | ctcaactaacttatgaaacctagtaacttatctatagattcttcttgcta  | 11975 |
| ENSOARG000000 | 8801  | TTTGGGGACATTTCTGATACTGGCAAATGACAGTTTTTTGTTTCTTACTT  | 8850  |
|               |       |                                                     |       |
| KP025765      | 11976 | tttggggacattttctgatactggcaaatgacagttttttgtttcttactt | 12025 |
| ENSOARG000000 | 8851  | TCCAATAGGTATGTTTTATTTCAATTTCTTACCTTATTGCATTGGCCAGG  | 8900  |
|               |       |                                                     |       |
| KP025765      | 12026 | tccaataggtatgttttatttcattttcttaccttattgcattggccagg  | 12075 |
| ENSOARG000000 | 8901  | ACTCATCAGAGGTTCTTAAACAGGGGAGACATGTGTCTGGGTTTGTGTTT  | 8950  |
|               |       |                                                     |       |
| KP025765      | 12076 | actcatcagaggttcttaaacaggggagacatgtgtctgggtttgtgttt  | 12125 |
| ENSOARG000000 | 8951  | TAGGGTGATCACTCCATCTGCAGAGTGAAGGTAGAGGGCAGAATAGAGC   | 9000  |
|               |       |                                                     |       |
| KP025765      | 12126 | tagggtgatcactccatctgcagagtggaaggtagggggcagaatagagc  | 12175 |
| ENSOARG000000 | 9001  | TGGAAAAATGGAGAGAAGGGAACCTCCAGGAAAGAGAGGAAGAGATGACTC | 9050  |
|               |       |                                                     |       |
| KP025765      | 12176 | tggaaaaatggagagaagggaaactccaggaaagagaggaagagatgactc | 12225 |
| ENSOARG000000 | 9051  | TGCCTGTGGCTGGAGATAGCCTAGCTCCCAAGGCAGCTCCGCCGGGTGGG  | 9100  |
|               |       |                                                     |       |
| KP025765      | 12226 | tgctgtggctggagatagcctagctcccaaggcagctccgccgggtggg   | 12275 |
| ENSOARG000000 | 9101  | CAGGCTGGACTGCAGGTGCAAATGTGCCGCTCCTCTCTCGCCTTCCCTTC  | 9150  |
|               |       |                                                     |       |
| KP025765      | 12276 | caggctggactgcaggtgcaaatgtgccgctcctctctcgccttcccttc  | 12325 |
| ENSOARG000000 | 9151  | TTTGCAGACCGGGGACGCTGCTCCATGGGCCAGTGCCTGTGTGAGCCTGG  | 9200  |
|               |       |                                                     |       |
| KP025765      | 12326 | tttgcagaccggggacgctgctccatgggccaagtgcgtgtgtgagcctgg | 12375 |
| ENSOARG000000 | 9201  | CTGGACAGGCCTGAGCTGTGACTGTCTCTCAGCAACGCCACCTGCATCG   | 9250  |
|               |       |                                                     |       |
| KP025765      | 12376 | ctggacaggcctgagctgtgactgtcctctcagcaacgccacctgcatcg  | 12425 |
| ENSOARG000000 | 9251  | ACAGTAACGGGGTAGGCCTGGGCATGCGGCAGGCAGTGGGGGACAGGGGG  | 9300  |
|               |       |                                                     |       |
| KP025765      | 12426 | acagtaacggggtaggcctgggcatacggcaggcagtgggggacaggggg  | 12475 |
| ENSOARG000000 | 9301  | CGGGCCCCCTCTCAGACAGGGATGGGGGCGCAGCTGGCTCACGGGGGCC   | 9350  |

|               |       |                                                     |       |
|---------------|-------|-----------------------------------------------------|-------|
|               |       |                                                     |       |
| KP025765      | 12476 | cgggccccctctcagacagggatggggcgagctggctcacggggcc      | 12525 |
| ENSOARG000000 | 9351  | CCCTTTTACCTCAGGCCTCTGTAACGGACGTGGCTACTGCGAGTGC      | 9400  |
|               |       |                                                     |       |
| KP025765      | 12526 | cccttttacctcaggcctctgtaacggacgtggctactgcgagtgcggc   | 12575 |
| ENSOARG000000 | 9401  | CGTTGCCACTGCAACCAACAGTCACTCTACACGGACACCGTCTGCGAGAT  | 9450  |
|               |       |                                                     |       |
| KP025765      | 12576 | cgttgccactgcaaccaacagtcactctacacggacaccgtctgcgagat  | 12625 |
| ENSOARG000000 | 9451  | CAACTACTCGGCGGTGAGGCCGACTCGCTGGGTGTGGGTGCGGGACCC    | 9500  |
|               |       |                                                     |       |
| KP025765      | 12626 | caactactcggcggtagggcggactcgtgggtgtgggtgcggggacc     | 12675 |
| ENSOARG000000 | 9501  | ATTGCCATGGGGCTGCCAAGGGGTGAGGTTGCGGGAGCGGCCTGGC      | 9550  |
|               |       |                                                     |       |
| KP025765      | 12676 | attgccatggggctgccaaggggtgaggttgcgggagcgggcctggc     | 12725 |
| ENSOARG000000 | 9551  | AGGGGCCACCCAGCACAGTGCCCGTCTGCCCTCCTCCTCGCCACCCAG    | 9600  |
|               |       |                                                     |       |
| KP025765      | 12726 | aggggccaccagcacagtgccgtctgcccctcctcctcggccaccag     | 12775 |
| ENSOARG000000 | 9601  | ATCCGCCTGGGCCTCTGTGAGGACCTGCGCTCCTGCGTGCAAGTCCAGGC  | 9650  |
|               |       |                                                     |       |
| KP025765      | 12776 | atccgcctgggcctctgtgaggacctgcgctcctgcgtgcagtgccaggc  | 12825 |
| ENSOARG000000 | 9651  | CTGGGGCACTGGTAAAAGAAGGGGCGCACGTGCGAGGAGTGCAGTTCA    | 9700  |
|               |       |                                                     |       |
| KP025765      | 12826 | ctggggcactggtgaaaagaagggcgcacgtgcgaggagtgcagcttca   | 12875 |
| ENSOARG000000 | 9701  | AGGTCAAGATGGTGGATGAGCTTAAGAAAGGTACAGGGCAGGCAAGAGAA  | 9750  |
|               |       |                                                     |       |
| KP025765      | 12876 | aggtcaagatggtggatgagcttaagaaaggtacagggcaggcaagagaa  | 12925 |
| ENSOARG000000 | 9751  | CTAGGCAAGGGGAGACCTCTGAGAGGTGGGGGTGTCGCTCATCGGGCGG   | 9800  |
|               |       |                                                     |       |
| KP025765      | 12926 | ctaggcaaggggagacctctgagaggtgggggtgtcgctcatcggggcgg  | 12975 |
| ENSOARG000000 | 9801  | GGCTGTAGAGCTGGGTAGGGGCTCATAGTCCAAAGTGAGGACAGGCAGT   | 9850  |
|               |       |                                                     |       |
| KP025765      | 12976 | ggctgtagagctgggtaggggctcatagtcxaaagtgaggacaggcagt   | 13025 |
| ENSOARG000000 | 9851  | CCGCAAAGAGGGGTTCAGGCCTGGGAGTGGTCACAGAATCCAGACCGG    | 9900  |
|               |       |                                                     |       |
| KP025765      | 13026 | ccgcaaagaggggttcaggcctggggagtggtcacagaatccagaccgg   | 13075 |
| ENSOARG000000 | 9901  | GCACACAGACCCAGGGAGGGAACGCACAGTCTGGCCAGGGCACCCAGTCC  | 9950  |
|               |       |                                                     |       |
| KP025765      | 13076 | gcacacagaccagggagggaaacgcacagctctggccagggcaccagtcc  | 13125 |
| ENSOARG000000 | 9951  | TGGGGAGGGGGCCATGATCATAGCAAAGGTGCAAAAATGGGCCCTGGGGC  | 10000 |
|               |       |                                                     |       |
| KP025765      | 13126 | tggggagggggccatgatcatagcaaaggtgcaaaaatgggcccctggggc | 13175 |
| ENSOARG000000 | 10001 | ACACAGCCTCCTTCTCTGGTCAGAAAAATGTTCTAGAAGCCAGCTCC     | 10050 |
|               |       |                                                     |       |
| KP025765      | 13176 | acacagcctccttctctgttcagaaaaatgttctagaagcccagctcc    | 13225 |
| ENSOARG000000 | 10051 | TGAGTGATGCCAGGACAGGCACAGATCTGCAGGCTTTGA-GGT-CTGGG   | 10098 |
|               |       |                                                     |       |
| KP025765      | 13226 | tgagtgatgccagggacaggcacagatctgcaggctttgacggtctggg   | 13275 |
| ENSOARG000000 | 10099 | CAGGGCAGCCCCACTTTACCCCCAACCCCA-CCCCCATGTGCACAGT     | 10147 |
|               |       |                                                     |       |

|               |       |                                                     |       |
|---------------|-------|-----------------------------------------------------|-------|
| KP025765      | 13276 | cagggcagccccactttaccccccaaccccaccccccatgtgcacagt    | 13325 |
| ENSOARG000000 | 10148 | CTGCTGGGAACTCACATTCTTCCCCAGGGAGAGGCCTCTCTCCTCCATG   | 10197 |
| KP025765      | 13326 | ctgccgggaactcacattcttccccagggagaggcctcctctcctccatg  | 13375 |
| ENSOARG000000 | 10198 | CCAACCCCGTGATGGGCGAGGTGGGCCGAGAGCAAGGCCGTGGTGAGGA   | 10247 |
| KP025765      | 13376 | ccaaccccgtgatgggcgaggtgggcccagagagcaaggccgtggtgagga | 13425 |
| ENSOARG000000 | 10248 | GCGGACCCCTCCCCGACCCTGAGGTGCTCCGGGCTGGGGTCGGGTGCC    | 10297 |
| KP025765      | 13426 | gcfgaccctcgccaggcctgaggtgctccgggctgaggttggtgccc     | 13475 |
| ENSOARG000000 | 10298 | TGCTGACCGTCTGTGTCTGCAGCGGAGGAGGTGGTGGAGCACTGCTCCTT  | 10347 |
| KP025765      | 13476 | tgctgaccgtctgtgtctgcagcggagggaggtggtggagcactgctcctt | 13525 |
| ENSOARG000000 | 10348 | CCGGGATGAGGATGACGACTGTACCTACAGTTACACCGTGGAGGGTGACA  | 10397 |
| KP025765      | 13526 | ccgggatgaggatgacgactgtacctacagttacaccgtggagggtgaca  | 13575 |
| ENSOARG000000 | 10398 | GCGCCCCCGGTCCCAACAGCACCGTCTCTGGTGCAGAGGAGGAAGGGTGAG | 10447 |
| KP025765      | 13576 | gcgccccctgggcccacagcaccgtcctggtgcagaggaggaagggtag   | 13625 |
| ENSOARG000000 | 10448 | CCGGCGGGCTGGCAGGGATGGCCTGGGTGGCCTGTACAGCCTGCTTACG   | 10497 |
| KP025765      | 13626 | ccggcgggctggcagggatgggcatgggtggcctgtcaggcctgcttcag  | 13675 |
| ENSOARG000000 | 10498 | GGGGATGGCACTGGCTCCCTCCTCCTCCTTTCTCCCTAGAATGCCCC     | 10547 |
| KP025765      | 13676 | ggggatggcactggctccctcctcctcctcttctcctccctagaatgcccc | 13725 |
| ENSOARG000000 | 10548 | CCGGGCACCTTCTGGTGGCTCATCCCCCTGCTCATCTTCTCCTTCTGTT   | 10597 |
| KP025765      | 13726 | ccgggcaccttctggtggctcatccccctgctcatcttctcctcctctgtt | 13775 |
| ENSOARG000000 | 10598 | CCCGTCTGCTGCTGCTGCTGCTGCTGGAAGTACTGTGCCTGCTGCAAGG   | 10647 |
| KP025765      | 13776 | cccggtcctgctgctgctgctgctgctggaagtactgtgcctgctgcaagg | 13825 |
| ENSOARG000000 | 10648 | TGGGGGCTTCCCCGGTCCCGACCCACCGGGTCCCTGTAGAGGGCAGGG    | 10697 |
| KP025765      | 13826 | tgggggcttccccggtcccgacccaccggggtccctgtagagggcaggg   | 13875 |
| ENSOARG000000 | 10698 | GCCAAGTGAACCCACACATTCCTCCCAGCTCTGGTGCCATCCCCACCCA   | 10747 |
| KP025765      | 13876 | gccaagtgaaccacacattcctcccagctctggtgcatccccaccca     | 13925 |
| ENSOARG000000 | 10748 | GCCCCTCGCCTTGCCAGCCACCAGTGGCCGAATTCCTGGGAGTCCCTGG   | 10797 |
| KP025765      | 13926 | gccccctgcctctgccagccaccagtggccgaattcctgggagtccctgg  | 13975 |
| ENSOARG000000 | 10798 | CCCAGGGGTGAGCCG-----CAACAGCCAACAGGAAGGAAG           | 10833 |
| KP025765      | 13976 | cccgggggtcagccgatgcaaagggtcacaacagccaacaggaaggaag   | 14025 |
| ENSOARG000000 | 10834 | GGCTCTGCCACCCAGGAGCTGGCCATCTCCCTGGGAGAAAAGACTGGAGA  | 10883 |
| KP025765      | 14026 | ggctctgccaccaggagctggccatctccctgggagaaaagactggaga   | 14075 |
| ENSOARG000000 | 10884 | CAGGAGAGTGCAGAGTATGGCCCGCGTGGAATACTGAAGGGGGCAGAGG   | 10933 |
| KP025765      | 14076 | caggagagtgcagagtatggcccggcgtggaataactgaagggggcagagg | 14125 |

|               |       |                             |                            |           |
|---------------|-------|-----------------------------|----------------------------|-----------|
| ENSOARG000000 | 10934 | CGCCCATACAGCAGCCCCAGGGTCGTA | CGTACTCAAGTGTGTTACAGGAAAAA | 10983     |
|               |       |                             |                            |           |
| KP025765      | 14126 | cgcccatacagcagccccagggtcgta | ctcaagtgtgttacaggaaaaa     | 14175     |
| ENSOARG000000 | 10984 | GCGTTCTGTGATCAAATACTTTTGAA  | AAGCAGTTTCTCCTCTGCAGGGC    | 11033     |
|               |       |                             |                            |           |
| KP025765      | 14176 | gcgttctgtgatcaaatacttttgaaa | aacggtttctcctctgcagggc     | 14225     |
| ENSOARG000000 | 11034 | TTCTCGGAGCCTTCGAGCTAGTTGTT  | GCATAATGAACTACATGGGGAA     | 11083     |
|               |       |                             |                            |           |
| KP025765      | 14226 | ttctcggagcctttgagctagttg    | tttgcataatgaaactacatggagaa | 14275     |
| ENSOARG000000 | 11084 | GGAATTCAGTGCTTCCCGAAGGGTTT  | GATCACAGAACCTTTTACTTTCC    | 11133     |
|               |       |                             |                            |           |
| KP025765      | 14276 | ggaattcagtgcttcccgaaggggtt  | gatcacagaaccttttactttcc    | 14325     |
| ENSOARG000000 | 11134 | GGAGTAGATAGTGGGACCAGAGTCCC  | AGGGCGTGCATTTTGGGTACCCTC   | 11183     |
|               |       |                             |                            |           |
| KP025765      | 14326 | ggagtagatagtgggaccagagtccc  | agggcgtgcattttgggtaccctc   | 14375     |
| ENSOARG000000 | 11184 | TGCCCTGTTCGCCTCTGTGCCACACC  | CAGGCCCTGTA                | ACTGCTTGA |
|               |       |                             |                            |           |
| KP025765      | 14376 | tgccctgttcgcctctgtgccacacc  | cagccccctgtaactgcttga      | 14425     |
| ENSOARG000000 | 11234 | TATCCTGATGTCTGGGAAGGCACTG   | CTGACCCCTCTGGACCACTGGCGT   | 11283     |
|               |       |                             |                            |           |
| KP025765      | 14426 | tatcctgatgtctgggaaggcactg   | ctgacccctctggaccactggcgt   | 14475     |
| ENSOARG000000 | 11284 | GGGTGGGAGGCAGTAGCCGGAGGGAC  | TTCCTGGGCCAGTATGGCCGTCT    | 11333     |
|               |       |                             |                            |           |
| KP025765      | 14476 | gggtgggaggcagtagccggagggact | tccctgggccagtggtggccgtct   | 14525     |
| ENSOARG000000 | 11334 | CAGCTCTTATCCCCACCCTCCTTGCC  | TCTAGGCCTGTCTGGCCCTTCTC    | 11383     |
|               |       |                             |                            |           |
| KP025765      | 14526 | cagctcttatccccaccctccttgcc  | tcttaggcctgtctggccctctc    | 14575     |
| ENSOARG000000 | 11384 | CCTTGCTGCAACCAAGGTACCGCCTG  | GCCTCGGCGGGGTGGTGGGGCT     | 11433     |
|               |       |                             |                            |           |
| KP025765      | 14576 | ccttgctgcaaccaaggtaccggcct  | ggcctcggcgggggtggtggggct   | 14625     |
| ENSOARG000000 | 11434 | CTGACAGCTCCTCCTTTGGCGGGGT   | GAGGGGAAGCAAGGC            | GCCAAGTC  |
|               |       |                             |                            |           |
| KP025765      | 14626 | ctgacagctcctcctttggcgggggt  | ggaggggaagcaaggcgccaagtc   | 14675     |
| ENSOARG000000 | 11484 | TGGGACAGAGGCCGGGACCGTGGCG   | GGGTCCCACCTGTGGGGTGTGGT    | 11533     |
|               |       |                             |                            |           |
| KP025765      | 14676 | tgggacagaggccggggaccgtggt   | gggggtcccacctgtggggtgtggt  | 14725     |
| ENSOARG000000 | 11534 | GGGGGAGGGTCTAGAAAGCAGCCCCT  | CAGCCCCGTACTGAGGCCAGGTC    | 11583     |
|               |       |                             |                            |           |
| KP025765      | 14726 | gggggagggctagaaaagcagccct   | cagccccgtactgaggccaggtc    | 14775     |
| ENSOARG000000 | 11584 | CCACAGGTCACATGGTGGGCTTCAAG  | GAAAGACCACTACATGCTGCGAGAG  | 11633     |
|               |       |                             |                            |           |
| KP025765      | 14776 | ccacaggtcacatggtgggcttcaag  | gaagaccactacatgctgcgagag   | 14825     |
| ENSOARG000000 | 11634 | AACCTGATGGCCTCGGACCACCTGG   | ACACGCCCTTGCTGCGCAGTGGGAA  | 11683     |
|               |       |                             |                            |           |
| KP025765      | 14826 | aacctgatggcctcggaccacctgg   | acacgcccttgctgcgcagcgggaa  | 14875     |
| ENSOARG000000 | 11684 | CCTCAAGGGGCGCGACACAGTCCGAT  | GGAAGATCACCAACAATGTGCAGC   | 11733     |
|               |       |                             |                            |           |
| KP025765      | 14876 | cctcaaggggcgcgacacagtccgat  | ggaagatcaccaacaatgtgcagc   | 14925     |

|               |       |                                                            |       |
|---------------|-------|------------------------------------------------------------|-------|
| ENSOARG000000 | 11734 | GGCCGGGCTTCGCTCGCACGCTGCTGGCATCAACCCCTCGGAGCTGGGT<br>      | 11783 |
| KP025765      | 14926 | ggccgggcttcgctcgcacgctgctggcatcaaccctcggagctgggt           | 14975 |
| ENSOARG000000 | 11784 | GAGGGCCGGGGCTGGGCACCGCGCTCCTGGCGCTGCCCTTGGGGCCCGG<br>      | 11833 |
| KP025765      | 14976 | gagggccggggctgggcaccgcggtcctggcgctgcccttggggcccgg          | 15025 |
| ENSOARG000000 | 11834 | GGCACGTTCACTACTGCTCGCTGCTCCGGGATCCAACATTCCTCTTTTCT<br>     | 11883 |
| KP025765      | 15026 | ggcacgttcaccactgctcgtgctcgggatccaacattcctcttttct           | 15075 |
| ENSOARG000000 | 11884 | CTGGGTATCAGGTGCAGGCACATGCCTGTTACCTCCTACCCTCCTGAGG<br>      | 11933 |
| KP025765      | 15076 | ctgggtatcgggtgcaggcacatgcctgttacctcctaccctcctgagg          | 15125 |
| ENSOARG000000 | 11934 | GGTACATGCCCCAGTGCCCCCAGCCTGAGCACGGCTTCTGGAGGGGAC<br>       | 11983 |
| KP025765      | 15126 | ggtacatgccccagtgccccagcctgagcacggcttctggaggggac            | 15175 |
| ENSOARG000000 | 11984 | TTCTGCAGTGCCCCACCATGGTGGGACTGACGATCCCCTCTTCTGCCTGC<br>     | 12033 |
| KP025765      | 15176 | ttctgcagtgccccacatggtgggactgacgatcccccttctcgcctgc          | 15225 |
| ENSOARG000000 | 12034 | CCTAGTGCCCTACGGACTGTCCCTGCG---GCCCCCTCTGCACCGAAA<br>       | 12079 |
| KP025765      | 15226 | cctagtgccctacggactgtccctgcggcttgcccgcctctgcaccgaga         | 15275 |
| ENSOARG000000 | 12080 | ACCGGCTGAAGCCTGGCACACGAGAGTGTGACCAGCTGCGCCAGGAGGTG<br>   . | 12129 |
| KP025765      | 15276 | acctgctgaagcctggcacacgagagtgtgaccagctgcccagagggtg          | 15325 |
| ENSOARG000000 | 12130 | GAAGAGAATGTAAGGAGCTGGTCCCCGGCAGCGGGTGGCTCTGGGCCGGG<br>     | 12179 |
| KP025765      | 15326 | gaagagaatgtaaggagctggtccccggcagcgggtggctctgggctggg         | 15375 |
| ENSOARG000000 | 12180 | TGTGAGACGGGTGGTG-----<br>                                  | 12195 |
| KP025765      | 15376 | tgtgagacgggtggtgggagggcagaggggaagctgccgtggcgcctggat        | 15425 |
| ENSOARG000000 | 12196 | -----TGGCCGGGGG<br>                                        | 12205 |
| KP025765      | 15426 | gtaaccgggtgggagagaagggcttcctcggacatgtgcatggccggggg         | 15475 |
| ENSOARG000000 | 12206 | GTCACCCTGGGATCTGCCTCCTGTGAATGCTTCCAGAAGGGTAGAGCCAC<br>     | 12255 |
| KP025765      | 15476 | gtcaccctgggatctgcctcctgtgaatgcttccagaagggtagagccac         | 15525 |
| ENSOARG000000 | 12256 | TGCTCATGCCTGTGGCCATGCCCCAGCCACGCCAGGAGGTCTCTGGG<br>        | 12305 |
| KP025765      | 15526 | tgctcatgcctgtggccatgccccagccacgccagaggtcctctggg            | 15575 |
| ENSOARG000000 | 12306 | TGCAGGGGCTCCCCAGGGCCCCAGCCTCACAGCCCTCCCTTGCCCGGCA<br>      | 12355 |
| KP025765      | 15576 | tcaggggctccccagggccccagcctcacagccctcccttgcccggca           | 15625 |
| ENSOARG000000 | 12356 | GCTGAACGAGGTGTACCGACAAATCTCAGGCGCTCACAGCCTTACGAGA<br>      | 12405 |
| KP025765      | 15626 | gctgaatgaggtgtaccgacaaatctcaggcgctcacagcctttagcaga         | 15675 |
| ENSOARG000000 | 12406 | CCAAGTTCGGTGGGTCTGGGCGCCCGGGTGGGGTTAGGGTGGGGCA<br>         | 12455 |
| KP025765      | 15676 | ccaagttccggtgggtcctgggcgcccggggtggggttaggggtggggca         | 15725 |
| ENSOARG000000 | 12456 | TTGCTCCCATAGCTGACGCCAGGGGATTTCTCCAAGCAGACAATCCCTG<br>      | 12505 |



|               |       |                                                     |       |
|---------------|-------|-----------------------------------------------------|-------|
|               |       |                                                     |       |
| KP025765      | 15726 | ttgctcccatagctgacgccaggggatttctccaagcagacaatccctg   | 15775 |
| ENSOARG000000 | 12506 | CCCCCTAGGGACCTTCTGGCTCACGGTCTTCACTTTGTCCCCACAGGCA   | 12555 |
|               |       |                                                     |       |
| KP025765      | 15776 | ccccctagggaccttctggctcacggctttcactttgtccccacaggca   | 15825 |
| ENSOARG000000 | 12556 | GCAGCCCAACGCTGGGAAAAAGTGAGTTGAAGACACATCGGTGGGCAGTA  | 12605 |
|               |       |                                                     |       |
| KP025765      | 15826 | gcagcccaacgctgggaaaaagtgagttgaagacacatcgggtgggcagta | 15875 |
| ENSOARG000000 | 12606 | CCAGCCCCAAGTCCCACCTCCCCATCCCCACCTCCCCATCCCCACCTC    | 12655 |
|               |       |                                                     |       |
| KP025765      | 15876 | ccagccccaagtcccacctccccatcccaactt-----ccgtctc       | 15916 |
| ENSOARG000000 | 12656 | CCCCATCCCAACTTCCGCC-----TCCA-----GTC                | 12681 |
|               |       | .                                                   |       |
| KP025765      | 15917 | catcatc-----tccgccccatgggagaggaggctgtccaggtctgtc    | 15960 |
| ENSOARG000000 | 12682 | CTGGGGTAGGACCTTCACTAAACACATACCCTTATGAAGCCCTCACCGAG  | 12731 |
|               |       |                                                     |       |
| KP025765      | 15961 | ctgggtaggaccttactaaacacataaccgatatgaagccctcaccgag   | 16010 |
| ENSOARG000000 | 12732 | AGCCAGCCCCTGCATGAGAACAAGGAACCCACAGGGAAACGAGCCAACCC  | 12781 |
|               |       |                                                     |       |
| KP025765      | 16011 | agccagcccctgtatgagaacaaggaaccacagggaaacgagccaacc    | 16060 |
| ENSOARG000000 | 12782 | AGTCCCTGGCCTCACACAGGCAATAGCCCCACCCAGTACCAGGGATGGC   | 12831 |
|               |       |                                                     |       |
| KP025765      | 16061 | agtccctggcctcacacgggcaatagccccaccagtaggagggc        | 16110 |
| ENSOARG000000 | 12832 | CGGTGCCCAGAGCCAGACCTCCTCTGAGGCCAAAAGCCTTGATCCTGGAG  | 12881 |
|               |       |                                                     |       |
| KP025765      | 16111 | cgggtgccagagccagacctcctctgaggccaaaagccttgatcctggag  | 16160 |
| ENSOARG000000 | 12882 | GCACCGCTGGTTACTAACCAGATGGTCCAGTGGGTGACACGCTTCTTTCC  | 12931 |
|               |       |                                                     |       |
| KP025765      | 16161 | gcaccgctggttactaaccagatggtccagtggatgacacgcttcttcc   | 16210 |
| ENSOARG000000 | 12932 | CAGTTCCCACCCGAGTCCCAGACCCCCAGGGAAGAGTGGGGTGGGGTT    | 12981 |
|               |       |                                                     |       |
| KP025765      | 16211 | cagttcccaccccgagtcccagacccccaggaagagtggggtggggtt    | 16260 |
| ENSOARG000000 | 12982 | CAATACCAAGAAGACAAAACCCAGCTCTTACCGGGCACAGCGCTGTCAGT  | 13031 |
|               |       |                                                     |       |
| KP025765      | 16261 | caataccaagaagacaaaaccagctcttaccgggcacagcgtgtcagt    | 16310 |
| ENSOARG000000 | 13032 | AAGAACCATTTAGACTGGCACTTTGAGTGCTGACCACCGCCAGACCTTG   | 13081 |
|               |       |                                                     |       |
| KP025765      | 16311 | aagaaccatthagactggcactttgagtgctgaccaccggccagacctg   | 16360 |
| ENSOARG000000 | 13082 | TTTTAAGGACTCGTGTGTGTGGTTCTTACTCAAGTGGGTATCAGTGCTAT  | 13131 |
|               |       |                                                     |       |
| KP025765      | 16361 | ttttaaggacgctgtgtgtggttcttactcaagtgggtatcagtgtat    | 16410 |
| ENSOARG000000 | 13132 | GCCCTTTGTATAGTTGAGGAACTGAGGATCAGAGAAGTTAAGTAACTTA   | 13181 |
|               |       |                                                     |       |
| KP025765      | 16411 | gccctttgtatagttgaggaaactgaggatcagagaagttaagtaactta  | 16460 |
| ENSOARG000000 | 13182 | CCCAAGGTTACCTAGCCATTAAGATAGAACCAGGGGAATTCCCTGGTGGT  | 13231 |
|               |       |                                                     |       |
| KP025765      | 16461 | ccaaggttacctagccattaagatagaaccaggggaattccctggtggt   | 16510 |
| ENSOARG000000 | 13232 | TCAGCAGTTAAAGCTTCTAGGTGGCTCAGTGGTAAAGAACCTGCCTAGT   | 13281 |
|               |       |                                                     |       |

|               |       |                                                       |       |
|---------------|-------|-------------------------------------------------------|-------|
| KP025765      | 16511 | tcagcagttaaagcttcctaggtggctcagtggttaaagaacctgcctagt   | 16560 |
| ENSOARG000000 | 13282 | GCAAAAAGACAAAAGACACGGGTTTCAGTCCCTGGGTCTGGAAGATTCCTG   | 13331 |
| KP025765      | 16561 | gcaaaagacaaaagacacgggttcagtcacctgggtctggaagatttcctg   | 16610 |
| ENSOARG000000 | 13332 | GAGTAGGAATGGCAACCCACTCCAGTATTCTTGTATGGAAAATTCCATGG    | 13381 |
| KP025765      | 16611 | gagtaggaatggcaacctccagtattccttgtatggaaaattccatgg      | 16660 |
| ENSOARG000000 | 13382 | ACGGAGGAACCCAGGTGGGCTACGGTCCATGGGGTCACAAAGAGTCGGACA   | 13431 |
| KP025765      | 16661 | acggaggaaccaggtgggctacggctccatgggggtcaciaaagagtccgaca | 16710 |
| ENSOARG000000 | 13432 | CGATTGAGCTCAACACAGGAGCAACAGTTAAGACTCAGGCTTTGGCTGCC    | 13481 |
| KP025765      | 16711 | cgattgagctcaacacaggagcaacagttaagactcaggctttggctgcc    | 16760 |
| ENSOARG000000 | 13482 | AGGGACCAGGTTCAATTTCCATATGGTTGGGTGAAAAAAAAAATTTAAA     | 13531 |
| KP025765      | 16761 | agggaccaggttcaatttccatattggttgggtgaaaaaaaaaacatttaa   | 16810 |
| ENSOARG000000 | 13532 | GATGAAGAGCCAGGATTGCAGCCAGGCAGTCTGGCCTGTCCCCTTGGCAT    | 13581 |
| KP025765      | 16811 | gatgaagagccaggattgcagccaggcagctctggcctgtccccttggcat   | 16860 |
| ENSOARG000000 | 13582 | CTTTGCTGCCCCGCCTCCATGTGTGCGTCATCAGCCCCTCTGGGAGAGGT    | 13631 |
| KP025765      | 16861 | ctttgctgccccgcctccatgtgtgctcatcagcccctctgggagaggt     | 16910 |
| ENSOARG000000 | 13632 | GGGCAGGGAGAGGAGCCTCCTCTCACAGATAAGGACCCTGAGGCTGCAGA    | 13681 |
| KP025765      | 16911 | gggcagggagaggagcctcctctcacagataaggaccctgaggctgcaga    | 16960 |
| ENSOARG000000 | 13682 | GGGCGGTGGCGGGGCCAGGCCGGTCTCTGCATCTGTCTGGCTCTGAAAAA    | 13731 |
| KP025765      | 16961 | gggcggtggcggggccaggccggtctctgcatctgtctggctctgaaaaa    | 17010 |
| ENSOARG000000 | 13732 | AACGCTTTTTTGTTCCTGGAATCTTGTGCCCAATGCAGAGAGGACAGGC     | 13781 |
| KP025765      | 17011 | aacgctttttgttgcctggaatcttgtgccccaatgcagagaggacaggc    | 17060 |
| ENSOARG000000 | 13782 | AGGAGGGGCAGACAGGGACGCGTGGCAGCCTCCCAGATGGCCTGACACTC    | 13831 |
| KP025765      | 17061 | aggaggggcagacagggacgctggcagcctcccagatggcctgacactc     | 17110 |
| ENSOARG000000 | 13832 | CCCACCCACCCCGCCCCAGGCAGGACCACACCATTGTGGACACGGTGCT     | 13881 |
| KP025765      | 17111 | cccacccaccccgccccaggcaggaccacaccattgtggacacggtgct     | 17160 |
| ENSOARG000000 | 13882 | GATGGCTCCCCGCTCAGCCAAGCAGGCCCTGTTGAAGTTGACAGAGAAGC    | 13931 |
| KP025765      | 17161 | gatggctccccgctcagccaagcaggccctgttgaagttgacagagaagc    | 17210 |
| ENSOARG000000 | 13932 | ACGTGGAGCAGGGGGCCTTCCATGAGCTCAAGGTGGCCCCCGGCTATTAC    | 13981 |
| KP025765      | 17211 | acgtggagcagggggccttccatgagctcaaggtggccccggctattac     | 17260 |
| ENSOARG000000 | 13982 | ACACTCACTGCAGACCAGGGTAGGTGGCAGGCTCCCTGTGCCCTCCCT      | 14031 |
| KP025765      | 17261 | acactcactgcagaccagggtaggtggcaggctccctgtgccctccct      | 17310 |
| ENSOARG000000 | 14032 | CTCACCTCCCACCCCGTGTGGCCCCCTGACCCTCGTCTGATGGCTCCCT     | 14081 |
| KP025765      | 17311 | ctcacctcccaccccggtgctggccccctgaccccgctctgatggctccct   | 17360 |

|               |       |                                                      |       |
|---------------|-------|------------------------------------------------------|-------|
| ENSOARG000000 | 14082 | ACCAGACGCCCCGAGGCATGGTGGAGTTCCAGGAGGGCGTGGAGCTGGTGG  | 14131 |
|               |       |                                                      |       |
| KP025765      | 17361 | accagacgccccgaggcatggtggagttccaggagggcgtggagctggtgg  | 17410 |
| ENSOARG000000 | 14132 | ACGTGCGGGTGCCTCTGTTTATCCGGCCCCGAGGATGACGACGAGAAGCAG  | 14181 |
|               |       |                                                      |       |
| KP025765      | 17411 | acgtgcggggtgcctctgtttatccggccccgaggatgacgacgagaagcag | 17460 |
| ENSOARG000000 | 14182 | CTGCTGGTGGAGGCCATTGATGTGCCCGTGGGCACCGCCACCCTCGGACG   | 14231 |
|               |       |                                                      |       |
| KP025765      | 17461 | ctgctggtggaggccattgatgtgcccgtgggcaccgccaccctcggacg   | 17510 |
| ENSOARG000000 | 14232 | CCGCCTGGTCAATATCACCATCATCAAGGAGCAAGGTCGGTCAGGATGGG   | 14281 |
|               |       |                                                      |       |
| KP025765      | 17511 | ccgcctggtcaatatcaccatcatcaaggagcaaggtcggtcaggatggg   | 17560 |
| ENSOARG000000 | 14282 | GGCCACCGGGGACCCAAAGGGGACTCTGGGACCCTTGTCTCTCCTCACAT   | 14331 |
|               |       |                                                      |       |
| KP025765      | 17561 | ggccaccggggaccxaaaggggactctgggacccttgtctctcctcacat   | 17610 |
| ENSOARG000000 | 14332 | CCAAGTGGAAAGTGGGACCTGGCCCTGTGGCCTAGGCAAGCAACTCAACCT  | 14381 |
|               |       |                                                      |       |
| KP025765      | 17611 | ccaagtggaagtgggacctggccctgtggcctaggcaagcaactcaacct   | 17660 |
| ENSOARG000000 | 14382 | CTGAGCCTTGGTTTCCCATCTGCAAATGGGTATTAGGCTCTTGTGAGG     | 14431 |
|               |       |                                                      |       |
| KP025765      | 17661 | ctgagccttggtttcccatctgcaaatgggtattaggctcttgtgagg     | 17710 |
| ENSOARG000000 | 14432 | GGGGTGTGGCTATACCTCTCATAAGTGTGCAGTGGGGGGCTTCTCTTA     | 14481 |
|               |       |                                                      |       |
| KP025765      | 17711 | ggggtgtggctataacctctcataagtgtgcagtggggggcttctctta    | 17760 |
| ENSOARG000000 | 14482 | TCATCACCAGAGGGTACTGAGTTTTCTGGAGCCGTCCCACGACCCTCTC    | 14531 |
|               |       |                                                      |       |
| KP025765      | 17761 | tcatcaccagagggtactgagtttctggagccgtcccacgacctctc      | 17810 |
| ENSOARG000000 | 14532 | CTTGTCTGTGGCCTTTGAACTTGAGACTGAATGGGTCCCAGGATGCCA     | 14581 |
|               |       |                                                      |       |
| KP025765      | 17811 | cttgtcctgtggcctttgaacttgagactgaatgggtcccaggatgccca   | 17860 |
| ENSOARG000000 | 14582 | GGACATCAGAGCAAGAAGGGACCTGGGGCTTCTTCTGCCAGGCCTACCT    | 14631 |
|               |       |                                                      |       |
| KP025765      | 17861 | ggacatcagagcaagaagggacctggggcttcttctgcccaggcctacct   | 17910 |
| ENSOARG000000 | 14632 | AGAAGGGCGGGCAAGGCGTCACACCACCGTCACTTACCTTGCCTTCCATG   | 14681 |
|               |       |                                                      |       |
| KP025765      | 17911 | agaagggcgggcaaggcgtcacaccaccgtcacttaccttgccttccctg   | 17960 |
| ENSOARG000000 | 14682 | CTAGTTCTCGGGAAACTGGACTTGTTGATAACCATCTTCCGGTGTCC      | 14731 |
|               |       |                                                      |       |
| KP025765      | 17961 | ctagttcctcgggaaactggacttgttgataaccatcttccgggtgtcc    | 18010 |
| ENSOARG000000 | 14732 | AGAGGGTCTGTTCTGGTCGCTGACCCCTCGTCCCCACTTGCTGCAGGACT   | 14781 |
|               |       |                                                      |       |
| KP025765      | 18011 | agagggctctgttctggtcgtgacccctcgtcccacttgctgcaggact    | 18060 |
| ENSOARG000000 | 14782 | TAGGCCTGCTCTGCCTCGGCCCTCGGTCTCAGCCCTCATCTCTGGTCTTG   | 14831 |
|               |       |                                                      |       |
| KP025765      | 18061 | taggcctgctctgcctcggccctcggctctcagccctcatctctggtcttg  | 18110 |
| ENSOARG000000 | 14832 | CTGCTGCCTGGCCTCCCTTCTGCCCTGACCCTTCCAGGATGTCAGCTG     | 14881 |
|               |       |                                                      |       |
| KP025765      | 18111 | ctgctgcctggcctcccttctctgccctgacccttccaggatgtcagctg   | 18160 |

|               |       |                                                     |                                |       |
|---------------|-------|-----------------------------------------------------|--------------------------------|-------|
| ENSOARG000000 | 14882 | GACACTGTTTCAGCCTTGTC                                | ACTTTTCTGGAAGACTTTTCCAGCCCCT   | 14931 |
|               |       |                                                     |                                |       |
| KP025765      | 18161 | gacactgtttcagccttg                                  | tcacttttctggaagacttttccagcccct | 18210 |
| ENSOARG000000 | 14932 | ATGTCCACCCTCCCCAGAGAGCAGAGGGGTGAGGAGTGATAAGAAGATTC  |                                | 14981 |
|               |       |                                                     |                                |       |
| KP025765      | 18211 | atgtccaccctccccagagagcagaggggtgaggagtgataagaagattc  |                                | 18260 |
| ENSOARG000000 | 14982 | CTGAAGTCTGAGCTGGGCTGGGCCAGAGGGAGGGCAGGGGCTGAAAGGGG  |                                | 15031 |
|               |       |                                                     |                                |       |
| KP025765      | 18261 | ctgaagtctgagctgggctgggccagagggagggcaggggctgaaagggg  |                                | 18310 |
| ENSOARG000000 | 15032 | GACTGTGGTCAAGATCCCTGAACAGCGCCTGGCTCCTTGACCCAGCGGG   |                                | 15081 |
|               |       |                                                     |                                |       |
| KP025765      | 18311 | gactgtggtcaagatccctgaacagcgcctggctccttgacccagcggg   |                                | 18360 |
| ENSOARG000000 | 15082 | ATCGTGTCTTTGAGCAGCCGAGTATTTGGTCAGCAGCGGGGAGCACGT    |                                | 15131 |
|               |       |                                                     |                                |       |
| KP025765      | 18361 | atcgtgtcctttgagcagcccagatatttggtcagcagcggggagcacgt  |                                | 18410 |
| ENSOARG000000 | 15132 | TGCCCGTATCCCTGTGGTCCGGCGCATCCTGGACAGCGGCAAGTCACAGG  |                                | 15181 |
|               |       |                                                     |                                |       |
| KP025765      | 18411 | tgcccgtatccctgtggtccggcgcacatcctggacagcggcaagtacagg |                                | 18460 |
| ENSOARG000000 | 15182 | TCTCCTACCGCACGCAGGACAACACCGCCAAGGGCAACCGGGTGAGTCCT  |                                | 15231 |
|               |       |                                                     |                                |       |
| KP025765      | 18461 | tctcctaccgcacgcaggacaacaccgccaagggcaaccgggtgagtcct  |                                | 18510 |
| ENSOARG000000 | 15232 | TGCCACGAGGTCAGGCACATCCCAAGGGCCCAGTGGGGGCCGGACACAGC  |                                | 15281 |
|               |       |                                                     |                                |       |
| KP025765      | 18511 | tgccacgaggtcaggcacatcccaagggcccagtgggggccggacacagc  |                                | 18560 |
| ENSOARG000000 | 15282 | GGCATCCTGGGTCTCTGGATGCTGGTGGTCCACAGGCTGGCCTCCCAGG   |                                | 15331 |
|               |       | .                                                   |                                |       |
| KP025765      | 18561 | agcatcctgggtctctggatgctggtggtgccacaggctggcctcccagg  |                                | 18610 |
| ENSOARG000000 | 15332 | GACACGTTCCCTCTGCCACCCTGCAGCAGGGGCATCAGTTCAGTTCAGTC  |                                | 15381 |
|               |       |                                                     |                                |       |
| KP025765      | 18611 | gacacgttccctctgccaccctgcagcaggggcatcagttcagttcagtc  |                                | 18660 |
| ENSOARG000000 | 15382 | GCTCAGTCATGTCCAACCTCTTGCACCCCATGGACTGCAGCACCCAGAG   |                                | 15431 |
|               |       |                                                     |                                |       |
| KP025765      | 18661 | gctcagtcatgtccaactccttgcgaccccatggactgcagcaccaccaga |                                | 18710 |
| ENSOARG000000 | 15432 | CCACCCTGTCCATCATCAACTCCTGGCGCTTACTCAAACCTCATGTCCATT |                                | 15481 |
|               |       |                                                     |                                |       |
| KP025765      | 18711 | ccaccctgtccatcatcaactcctggcgcttactcaaactcatgtccatt  |                                | 18760 |
| ENSOARG000000 | 15482 | GAGTTGGTGATGCCATCCAGCCATCTCATCCTCTGTGTCCCCTTCTCCTC  |                                | 15531 |
|               |       |                                                     |                                |       |
| KP025765      | 18761 | gagttggtgatgccatccagccatctcatcctctgtgtccccttctcctc  |                                | 18810 |
| ENSOARG000000 | 15532 | CCGCCTACAGTCTTTCCAGCATCAGGGTCTTTTCAAATGAGTTGGGAAG   |                                | 15581 |
|               |       |                                                     |                                |       |
| KP025765      | 18811 | ccgcctacagtctttccagcatcagggctttttcaaagagttgggaag    |                                | 18860 |
| ENSOARG000000 | 15582 | ATCTCCTGGAGAAGGAAGTGGCAACCTACTCCTATTCTTGCCTAGAAAAC  |                                | 15631 |
|               |       |                                                     |                                |       |
| KP025765      | 18861 | atctcctggagaaggaagtggcaacctactcctattcttgcctagaaaac  |                                | 18910 |
| ENSOARG000000 | 15632 | CCCATAGACAGAGGAGCCTAGTGGGCTACAGTCCATGGGGTGGCAAAAAG  |                                | 15681 |
|               |       |                                                     |                                |       |
| KP025765      | 18911 | cccatagacagaggagcctagtggttacagtcctatgggggtggcaaaaag |                                | 18960 |
| ENSOARG000000 | 15682 | TTGGACAGGACTAAGCAATTTCACTTTACCAAAAAGGCCAATGATGCC    |                                | 15731 |

|               |       |                                                     |       |
|---------------|-------|-----------------------------------------------------|-------|
|               |       |                                                     |       |
| KP025765      | 18961 | ttggacaggactaagcaatttcactttcaccaaaaaggccaatgatgccc  | 19010 |
| ENSOARG000000 | 15732 | TGAATAAGGCCTCCTCATGTCCAGACCATCCGAGTCCCCCTTGCAACATT  | 15781 |
|               |       |                                                     |       |
| KP025765      | 19011 | tgaataaggcctcctcatgtccagaccatccgtgtcccccttgcaacatt  | 19060 |
| ENSOARG000000 | 15782 | CCAGGACCCACCCAGATACTTCAAAGAAATAGACTGCCCTCTCTGCCATG  | 15831 |
|               |       |                                                     |       |
| KP025765      | 19061 | ccaggacccaccagatacttcaaagaaatagactgcctctctgccatg    | 19110 |
| ENSOARG000000 | 15832 | GCCCAGAGACTCTGGCCTTCTGTCCCCAGGCAGGCTCTCTGTCGGCCAG   | 15881 |
|               |       |                                                     |       |
| KP025765      | 19111 | gcccagagactctggccttctgtccccaggcaggccctctgtcggccag   | 19160 |
| ENSOARG000000 | 15882 | GCCACAGGACCGATCCTTCAGGGCAGGGAGGGCCTCGTGGTGGCCTGGTG  | 15931 |
|               |       |                                                     |       |
| KP025765      | 19161 | gccacaggaccgatccttcagggcagggagggcctcgtggtggcctggtg  | 19210 |
| ENSOARG000000 | 15932 | TCAACTTTTTTCGCAACTTAATCACTCTCAGACAACAGCCATGTCTGTGCT | 15981 |
|               |       |                                                     |       |
| KP025765      | 19211 | tcaactttttcgcaacttaatcactctcagacaacagccatgtctgtgct  | 19260 |
| ENSOARG000000 | 15982 | TAGTTTGGCTTATACGTCTGTTTTTCTAAATTAATTACCAACGTTTTGTG  | 16031 |
|               |       |                                                     |       |
| KP025765      | 19261 | tagtttggccttatacgtctgtttttctaaattaattaccaacgttttgtg | 19310 |
| ENSOARG000000 | 16032 | TATTTTGATTTTTTTGGCCATGCTGCGTGACTTGTGGGATCTTAGTCCCC  | 16081 |
|               |       |                                                     |       |
| KP025765      | 19311 | tattttgatTTTTTTGGCCATGCTGCGTGACTTGTGGGATCTTAGTCCCC  | 19360 |
| ENSOARG000000 | 16082 | CAACCAGGGATCAAACCTGGACCCAGGGA-CTGGCAATGAAATTGAAGAG  | 16130 |
|               |       |                                                     |       |
| KP025765      | 19361 | caaccagggatcaaacctggaccaggacactggcaatgaaattgaagag   | 19410 |
| ENSOARG000000 | 16131 | TCCTAACCCTGGACTTGGAGAAGGCAATGGCATCCCCTCCAGCACTCT    | 16180 |
|               |       |                                                     |       |
| KP025765      | 19411 | tcctaaccactggacttggagaaggcaatggcatcccactccagcactct  | 19460 |
| ENSOARG000000 | 16181 | TGCCTGGAAAATCCCATGGATGGAGGGCCTGGTGGGCTGCAGTCCATGG   | 16230 |
|               |       |                                                     |       |
| KP025765      | 19461 | tgcttgaaaatcccataggatggaggggcctggtgggctgcagtccatgg  | 19510 |
| ENSOARG000000 | 16231 | GGTCTCAAACAGTCGGACACGGCTGAGCGACTTCACTTTCACTTTTCACT  | 16280 |
|               |       |                                                     |       |
| KP025765      | 19511 | ggtctcaaacagtcggacacggctgagcgaacttcactttcacttttact  | 19560 |
| ENSOARG000000 | 16281 | TTCATGCATTGGAGAAGGAAGTGGCAACCCACTCCAGTGTCTTGCCTGG   | 16330 |
|               |       |                                                     |       |
| KP025765      | 19561 | ttcatgcattggagaaggaactggcaaccactccagtgttcttgcctgg   | 19610 |
| ENSOARG000000 | 16331 | AGGATCCCAGGGACGGGGAGCCTGGTGCCTGCCGTCTATGGAGTCACA    | 16380 |
|               |       |                                                     |       |
| KP025765      | 19611 | aggatcccaggacgggggagcctggtgcctgcccgtctatggagtcaca   | 19660 |
| ENSOARG000000 | 16381 | CAGAGTCGGACACGACTGAAGCGACTTAGCAACCACTGGACTGCCAGGGA  | 16430 |
|               |       |                                                     |       |
| KP025765      | 19661 | cagagtcggacacgactgaagcgacttagcaaccactggactgccaggga  | 19710 |
| ENSOARG000000 | 16431 | ATTCCCTATTACCATTACCAATTTTTTTAAATTAATTTTTTTATTGGCAT  | 16480 |
|               |       |                                                     |       |
| KP025765      | 19711 | attccctattaccattaccaatTTTTTTAAATTAATTTTTTTATTGGCAT  | 19760 |
| ENSOARG000000 | 16481 | ACAGTTGATTTACCATATTGTGTTTCTGCTGTACAGCTAAGTGAATCAGT  | 16530 |
|               |       |                                                     |       |

KP025765 19761 acagttgatttaccatattgtgtttctgctgtacagctaagtgaatcagt 19810  
 ENSOARG000000 16531 TAAACATAGACATATATCGACTCTTTTTTCAGATTCTGTTCCCATATAGAT 16580  
 ||||||||||||||||||||||||||||||||||||||||||||||||||||||||  
 KP025765 19811 taaacatagacatataatcgactctttttcagattctgttcccatatagat 19860  
 ENSOARG000000 16581 CATTACAGAGTACTGAGTAGAGTTTCTGTGCTATAACCATAGGTTCTTAT 16630  
 ||||||||||||||||||||||||||||||||||||||||||||||||||||||||  
 KP025765 19861 cattacagagtactgagtagagtttctgtgctataccataggttcttat 19910  
 ENSOARG000000 16631 TAGTTATCTATTTTATAACTATTACCAACATTTTAAACTAAAAATATTC 16680  
 ||||||||||||||||||||||||||||||||||||||||||||||||||||||||  
 KP025765 19911 tagttatctattttataactattaccaacattttaaaactaaaaatattc 19960  
 ENSOARG000000 16681 ATATCAAAACTTCACTGGACTTTCTCTTAGACCAGTAGTTAAGATGCTG 16730  
 |||||||||||||||||||||||||||||||||||||||.||||||||||||||  
 KP025765 19961 atatcaaaacttcaactggactttcctcttggaccagtagttaagatgctg 20010  
 ENSOARG000000 16731 CGCTTTCCTGCAGGGGCATGGGTTTCGATCCTGGTTTGGGGAAGTTCCA 16780  
 ||||||||||||||||||||||||||||||||||||||||||||||||||||||||  
 KP025765 20011 cgctttcactgcagggggcatgggttcgatcctggtttggggaagtcca 20060  
 ENSOARG000000 16781 TATGCCACAGAGTGTGCCCAAATTA AAAACGAAACAAAAC TCACTCA 16830  
 ||||||||||||||||||||||||||||||||||||||||||||||||||||||||  
 KP025765 20061 tatgccacagagtgtgccccaaaattaaaaacgaaacaaaacttcaactca 20110  
 ENSOARG000000 16831 AAAGTAATAAAGTTAGTCGCACTGGCCTGCAGGCCACTTGGCAATCAT 16880  
 ||||||||||||||||||||||||||||||||||||||||||||||||||||||||  
 KP025765 20111 aaagtaataaaggttagtcgactggcctgcaggcccacttggcaatcat 20160  
 ENSOARG000000 16881 GAGAGCAAGTGTGCGCACACAGCCTATTCTTTATTTCTTTTTATAGGTAG 16930  
 ||||||||||||||||||||||||||||||||||||||||||||||||||||||||  
 KP025765 20161 gagagcaagtgtgcgcacacagcctattctttatctttttataggtag 20210  
 ENSOARG000000 16931 GACTAGTTCTCATTACTGCTCTAATGCTCCCAGTAAAAATCCAAAAAGG 16980  
 ||||||||||||||||||||||||||||||||||||||||||||||||||||||||  
 KP025765 20211 gactagttctcattactgctcta atgctcccagtaaaaattccaaaaagg 20260  
 ENSOARG000000 16981 AATCTGTGCAACCATAACTTCACTGAAAGTGAAAAAGTGAAAGTGTAAA 17030  
 ||||||||||||||||||||||||||||||||||||||||||||||||||||||||  
 KP025765 20261 aatctgtgcaaccataacttcaactgaaagtgaaaaagtgaaagtgtaaa 20310  
 ENSOARG000000 17031 TCGCTAAGTCATGTCTGACTCTTGGTGGCCCATGGACTGCAGCCTACCAG 17080  
 ||||||||||||||||||||||||||||||||||||||||||||||||||||||||  
 KP025765 20311 tcgctaagtcatgtctgactcttgggtggcccatggactgcagcctaccag 20360  
 ENSOARG000000 17081 TCTCCTCTGTCCATGGGATTTTTCCAGGCAAGAATACTGGAGTGGATTGC 17130  
 ||||||||||||||||||||||||||||||||||||||||||||||||||||||||  
 KP025765 20361 tctcctctgtccatgggatttttccaggcaagaataactggagtggattgc 20410  
 ENSOARG000000 17131 CTTTCCTTTCTCCAGGGGATCTTCCCACCCAGGGATCAAACCTGAGTCT 17180  
 ||||||||||||||||||||||||||||||||||||||||||||||||||||||||  
 KP025765 20411 ctttcctttctccaggggatcttcccaccagggatcaaacctgagtct 20460  
 ENSOARG000000 17181 CCTGCATTGCGGGCAGATTCTTTACCATCTGAGCCACTAGGGAAGCCCTT 17230  
 ||||||||||||||||||||||||||||||||||||||||||||||||||||||||  
 KP025765 20461 cctgcattgcgggcagattctttaccatctgagccactaggaagccctt 20510  
 ENSOARG000000 17231 TATAAAGATCCTTTGGTAGTGAAC TATGTTTTTAAACATTTTAAATATT 17280  
 |||||||||||||||||||||||||||||||||||||||.||||||||||||||  
 KP025765 20511 tataaagatcctttggtagtgaaactatgttttttaacattttaaaatatt 20560  
 ENSOARG000000 17281 TCTCAACTTTTTATTTTGAAAACTTCAAACCTACAGCAGAAATGGAAAGA 17330  
 ||||||||||||||||||||||||||||||||||||||||||||||||||||||||  
 KP025765 20561 tctcaactttttatTTTGAAAACTTCAAACCTACAGCAGAAATGGAAAGA 20610

|               |       |                                                       |       |
|---------------|-------|-------------------------------------------------------|-------|
| ENSOARG000000 | 17331 | CTAATAAAATTAGCACCCATTTACTCTTGACATAGATTCACCCATTGTTG    | 17380 |
|               |       |                                                       |       |
| KP025765      | 20611 | ctaataaaattagcaccatttactcttgacatagattcaccattgttg      | 20660 |
| ENSOARG000000 | 17381 | ATAGTTGCTTTCTCTCTTTCTATACAGATGTATATATGTATGTGTATACA    | 17430 |
|               |       |                                                       |       |
| KP025765      | 20661 | atagttgctttctctctttctatacagatgtatatatgtatgtgtataca    | 20710 |
| ENSOARG000000 | 17431 | GATATATGCCTGGGGGTATAGCTCAGTGGTAGAGCGCATGCTTAGCATGC    | 17480 |
|               |       |                                                       |       |
| KP025765      | 20711 | gatatatgcctgggggtatagctcagtggttagagcgcacatgcttagcatgc | 20760 |
| ENSOARG000000 | 17481 | ATGAGGCCCTGGGTTCAATCCCCAGTACCTCCATCCTTACATTTTTCGGC    | 17530 |
|               |       |                                                       |       |
| KP025765      | 20761 | atgaggccctggggtcaatccccagtacctccatccttacatTTTTcggc    | 20810 |
| ENSOARG000000 | 17531 | TTCCCTGGTGGCTCGGACTGCTAGCAAAGAATCTGAATGTTAGTTTACAG    | 17580 |
|               |       |                                                       |       |
| KP025765      | 20811 | ttccctggtaggctcggactgctagcaaagaatctgaatgtagtttacag    | 20860 |
| ENSOARG000000 | 17581 | TGCCACCTAGTGAATCATGTGAAAAGGCTTCCCCCTACACACACTGCAA     | 17630 |
|               |       |                                                       |       |
| KP025765      | 20861 | tgccacctagtggaatcatgtgaaaaggcttccccctacacacactgcaa    | 20910 |
| ENSOARG000000 | 17631 | TCCATCTGCCCCATATCAGCTCAGTTCAGTACAGTCGTGTCCGACTCTTT    | 17680 |
|               |       |                                                       |       |
| KP025765      | 20911 | tccatctgccccatatacagctcagttcagtcagtcgtgtccaactcttt    | 20960 |
| ENSOARG000000 | 17681 | ACGACCCCATGAATCACAGCACGCCAGGCCTCCCTGTCCATCACCAACTC    | 17730 |
|               |       |                                                       |       |
| KP025765      | 20961 | acgaccccatgaatcacagcacgccaggcctccctgtccatcaccaactc    | 21010 |
| ENSOARG000000 | 17731 | CAGGAGTCCACTCAAAGTCACGTCCATCGAGTCAGTGATGCCATCCAGCC    | 17780 |
|               |       | .                                                     |       |
| KP025765      | 21011 | ccggagtccactcaaagtcacgtccatcgagtcagtgatgcatccagcc     | 21060 |
| ENSOARG000000 | 17781 | ATCTCATCCTCTGTTGTCCCCTTCTCCTCCTGCCCCAATCCCTCCCAGC     | 17830 |
|               |       |                                                       |       |
| KP025765      | 21061 | atctcatcctctgtgtgtccccttctcctcctgcccccaatccctcccagc   | 21110 |
| ENSOARG000000 | 17831 | ATCAGAGTATTTTCCAATGAGTCAACTCTTCACATGAGATGGCCAAAGTA    | 17880 |
|               |       |                                                       |       |
| KP025765      | 21111 | atcagagtatTTTccaatgagtcaactcttcacatgagatggccaaagta    | 21160 |
| ENSOARG000000 | 17881 | CTGGAGTTTCAACTTTAGCATCATTCTTCCAAAGAAAACCCAGGGCTGA     | 17930 |
|               |       |                                                       |       |
| KP025765      | 21161 | ctggagtttcaacttttagcatcattccttccaaagaaaaccagggtga     | 21210 |
| ENSOARG000000 | 17931 | TCTCCTTCAGAATGGACTGGTTGGATCTCCTTGCAGTCCAAGGGACTCTC    | 17980 |
|               |       |                                                       |       |
| KP025765      | 21211 | tctccttcagaatggactggttggatctccttgcagtcctaaggactctc    | 21260 |
| ENSOARG000000 | 17981 | AAGAGTCTTCTCCAACATCACAGTTCAAAGCATCAATTCTTTGGCGCTC     | 18030 |
|               |       |                                                       |       |
| KP025765      | 21261 | aagagtcttctccaacatcacagttcaaagcatcaattctttggcgctc     | 21310 |
| ENSOARG000000 | 18031 | AGCCTTCTTCACAGTCCAACCTCTCACATCCATACATGACCACTGGGAAAA   | 18080 |
|               |       |                                                       |       |
| KP025765      | 21311 | agccttcttcacagtccaactctcacatccatacatgaccactgggaaaa    | 21360 |
| ENSOARG000000 | 18081 | CCATAGCTTTGACTAGATGGACCTTTGTTGGCAAAGTAATGTCTCTGCTT    | 18130 |
|               |       |                                                       |       |
| KP025765      | 21361 | ccatagctttgactagatggacctttgttggcaaagtaatgtctctgctt    | 21410 |

|               |       |                                                     |       |
|---------------|-------|-----------------------------------------------------|-------|
| ENSOARG000000 | 18131 | TTCAATATGCTATCTAGGCTGGTCATAACTTTTCCTTTCAAGGAGTGAGCG | 18180 |
|               |       |                                                     |       |
| KP025765      | 21411 | ttcaatatgctatctaggctggtcataacttttcctttcaaggagtgagcg | 21460 |
| ENSOARG000000 | 18181 | TCTTTTAATTTTCATGGCTGTAGTCACCATCTGCAGTGATTTTGGAGCCCC | 18230 |
|               |       |                                                     |       |
| KP025765      | 21461 | tcttttaattttcatggctgtagtcaccatctgcagtgatTTTGGAGCCCC | 21510 |
| ENSOARG000000 | 18231 | AAAAAATAAAGTCTGACACTGTTTCCACTGTTTCCCCTCTATTTCCCAT   | 18280 |
|               |       |                                                     |       |
| KP025765      | 21511 | aaaaaataaagtctgacactgTTTCCACTGTTTCCCCTCTATTTCCCAT   | 21560 |
| ENSOARG000000 | 18281 | GAAGTGATGGGACCGGATGCCATGATCTTTGTTTTCTGACTTAATCTCAA  | 18330 |
|               |       |                                                     |       |
| KP025765      | 21561 | gaagtgatgggaccggatgccatgatctTTGTTTTCTGACTTAATCTCAA  | 21610 |
| ENSOARG000000 | 18331 | GATGTTTCAGGAAAAGCTCTAGGGCATTGAAAAATAAAAAGTGGAGGTAA  | 18380 |
|               |       |                                                     |       |
| KP025765      | 21611 | gatgttcaggaaaaagctctagggcattgaaaaataaaaactggaggtaa  | 21660 |
| ENSOARG000000 | 18381 | TAGAAGCAACCCACCCAGGAAGCAGGGCCGGGGGATGGTGGGATTCAGA   | 18430 |
|               |       |                                                     |       |
| KP025765      | 21661 | tagaagcaaccacccaggaagcagggccgggggatggTGGGATTCAGA    | 21710 |
| ENSOARG000000 | 18431 | CTTCAGAGCCCCAGGGTGGGAAGAGTTCCTCCCTCCGAGGTGAGGCCTG   | 18480 |
|               |       |                                                     |       |
| KP025765      | 21711 | cttcagagccccagggTGGGAAGAGTTCCTCCCTCCGAGGTGAGGCCTG   | 21760 |
| ENSOARG000000 | 18481 | CAAATCTCAGCTCCCCTGGCTGAGTGCCTGCCTGTGTGGGACCTCCTGT   | 18530 |
|               |       |                                                     |       |
| KP025765      | 21761 | caaatctcagctcccctggctgagTGCCTGCCTGTGTGGGACCTCCTGT   | 21810 |
| ENSOARG000000 | 18531 | ATCTGCATCCTTGTCTCTCTGTGCCTTGGTTCAAATCCCAGTTCACCAC   | 18580 |
|               |       |                                                     |       |
| KP025765      | 21811 | atctgcatcctTGTCTCTCTGTGCCTTGGTTCAAATCCCAGTTCACCAC   | 21860 |
| ENSOARG000000 | 18581 | AACTACCTGTGTGAACCTGGGCATCTTTCTTTACCTCTGTGTGCCTCAGT  | 18630 |
|               |       |                                                     |       |
| KP025765      | 21861 | aactacctgtgtgaacTGGGCATCTTTCTTTACCTCTGTGTGCCTCAGT   | 21910 |
| ENSOARG000000 | 18631 | TACCTGATCTGTAAAATGGGGACAGTAATATCTCTACCTCACTCTGCCCT  | 18680 |
|               |       |                                                     |       |
| KP025765      | 21911 | tacctgatctgtAAAATGGGGACAGTAATATCTCTACCTCACTCTGCCCT  | 21960 |
| ENSOARG000000 | 18681 | GAGGAAGAAACGAGCTAATATCTGTAAAGTACTTGATGCACAAGAGGTGC  | 18730 |
|               |       |                                                     |       |
| KP025765      | 21961 | gaggaagaaacgagctAATATCTGTAAAGTACTTGATGCACAAGAGGTGC  | 22010 |
| ENSOARG000000 | 18731 | TGTATAAACAGGAGCCGTTCCGTGTCCATGTGGGACAGTCTGTGCGTGAG  | 18780 |
|               |       |                                                     |       |
| KP025765      | 22011 | tgtataaacaggagccgTCCGTGTCCATGTGGGACAGTCTGTGCGTGAG   | 22060 |
| ENSOARG000000 | 18781 | GGTCTCTGCATTGGCTGTGGGGTGGGGTGGAGCGTGTAGCCTTGACTCG   | 18830 |
|               |       |                                                     |       |
| KP025765      | 22061 | ggtctctgcattggctGTGGGGTGGGGTGGAGCGTGTAGCCTTGACTCG   | 22110 |
| ENSOARG000000 | 18831 | TCTCCCAGGCCTGCTCCAACCTCTGACCCCTTCCCATTCTAGGACTACAT  | 18880 |
|               |       |                                                     |       |
| KP025765      | 22111 | tctcccaggcctgctCCAACCTCTGACCCCTTCCCATTCTAGGACTACAT  | 22160 |
| ENSOARG000000 | 18881 | CCCCATGGAGGGTGAGCTGCTGTTCCAACCTGGAGAGACCTGGAAGGAGC  | 18930 |
|               |       |                                                     |       |
| KP025765      | 22161 | ccccatggagggtgagctGCTGTTCCAACCTGGAGAGACCTGGAAGGAGC  | 22210 |
| ENSOARG000000 | 18931 | TGCAGGTGAAGCTGCTGGAGCTGCAGGAGATGGACTCCCTCCTGCGGGGC  | 18980 |





|               |       |                                                        |       |
|---------------|-------|--------------------------------------------------------|-------|
| KP025765      | 23011 | ccatggaccgcggcctccctgttcatcaccaactctcggagtactca        | 23060 |
| ENSOARG000000 | 19781 | ACTCATGTCTATTGAGTTGGTGATGCCATCTAACCATCTCATCCTCTGTT     | 19830 |
| KP025765      | 23061 | <br>actcatgtctattgagttggtgatgccatctaaccatctcatcctctgtt | 23110 |
| ENSOARG000000 | 19831 | GTCCCCTTCTCCTCCTGCCTTCAATATTTCCAGCGTCAGGGTCTTTTCA      | 19880 |
| KP025765      | 23111 | <br>gtccccttctcctcctgccttcaatatttcccagcgtcagggtcttttca | 23160 |
| ENSOARG000000 | 19881 | AATGAGTCAGTTCTTCGCATCAGGTCGCCAAAATATTGGAGTTTCTGCTT     | 19930 |
| KP025765      | 23161 | <br>aatgagtcagttcttcgcatcaggtcgccaaaatattggagtttctgctt | 23210 |
| ENSOARG000000 | 19931 | CAACATCAGTCCTTCCAATGAACATTCAGGACTGATCTTTAGAATGGACT     | 19980 |
| KP025765      | 23211 | <br>caacatcagtccttccaatgaacattcaggactgatctttagaatggact | 23260 |
| ENSOARG000000 | 19981 | GGTTGGATCTCCTTGCAAGGGACTCTTCAAGAGTCTTCTCCAACA          | 20030 |
| KP025765      | 23261 | <br>ggttggatctccttgcaagggactcttcaagagtcttctccaaca      | 23310 |
| ENSOARG000000 | 20031 | CCACAGTTCACAAGCGTCAATACTTTGGCCCTCAGCTTTCTTTATAGTCC     | 20080 |
| KP025765      | 23311 | <br>ccacagttcacaagcgtcaatactttggccctcagctttctttatagtcc | 23360 |
| ENSOARG000000 | 20081 | AACTCTCATATCCATACATGTGATGTGATGTGAAGGGGAAGGAGTCTTGG     | 20130 |
| KP025765      | 23361 | <br>aactctcatatccatacatgtgatgtgatgtgaaggggaaggagtcttgg | 23410 |
| ENSOARG000000 | 20131 | TGTTTAACTGTGCGTCTGGTGCCCTGGTGGTGCAGATGGGTTCTGCC        | 20180 |
| KP025765      | 23411 | <br>tgtttaactgtgctctggtgccccctggtggtgcagatgggttctgcc   | 23460 |
| ENSOARG000000 | 20181 | CCCTCAAAGCCAGAGAGGAGTCTCTGCTGACTGCCTTGCCCTGGCTTGAC     | 20230 |
| KP025765      | 23461 | <br>ccctcaaagccagagaggagtctctgctgactgccttgccctggcttgac | 23510 |
| ENSOARG000000 | 20231 | CCTCTGCAGATGAGCTGGACCGGAACCTAATGAACCAGACTGTGTCATCA     | 20280 |
| KP025765      | 23511 | <br>cctctgcagatgagctggaccggaacttaatgaaccagactgtgtcatca | 23560 |
| ENSOARG000000 | 20281 | CCCCACCACCCCGGGTGACCTGGGTGCCCCACAGAATCCAATGCCAA        | 20330 |
| KP025765      | 23561 | <br>ccccaccaccccggggtgacctgggtgccccacagaatccaatgcca    | 23610 |
| ENSOARG000000 | 20331 | GGCTGCCGGGTCCCGGAAGATCCACTTCAACTGGTTGCCGCTCCTGGCA      | 20380 |
| KP025765      | 23611 | <br>ggctgccgggtcccggaagatccacttcaactggttgccgctcctggca  | 23660 |
| ENSOARG000000 | 20381 | AGCCAACAGGGTACCGGTAAGGTGGGGGCGTTGAGGGAGGTGGATGGG       | 20430 |
| KP025765      | 23661 | <br>agccaacagggtaccgggtaaggtgggggcgttgaggaggtggatggg   | 23710 |
| ENSOARG000000 | 20431 | AGGCCGGGCATACACTGTTGAGGTGAGCCCGCTGA-----               | 20465 |
| KP025765      | 23711 | <br>aggccgggcatacactgttgaggtgagcccgctgaggccagagaggccc  | 23760 |
| ENSOARG000000 | 20466 | -----                                                  | 20465 |
| KP025765      | 23761 | cagggagaggagaggcgctgcttggcctcagtgggtggggaacccccatc     | 23810 |
| ENSOARG000000 | 20466 | -GCCGCTGAGGGAGGAAGAAGTCCTTGAATGTGGCCCCAGAACCAGA        | 20514 |
| KP025765      | 23811 | <br>ggccgctgagggaggaagaagtccttgaatgtggccccagaaccaga    | 23860 |



|               |       |                                                         |       |
|---------------|-------|---------------------------------------------------------|-------|
| ENSOARG000000 | 21315 | CTGCCCACGCAGGTTAACGAGAGTGGCTCAATTCTACATGGGTGTCTTCA<br>  | 21364 |
| KP025765      | 24661 | ctgcccacgcaggttaacgagagtggctcaattctacatgggtgtcttca      | 24710 |
| ENSOARG000000 | 21365 | GGTCAGGGTAGAGAGATTTAGCAAATAAAAAGCAGAGGACGCCCTGAACT<br>  | 21414 |
| KP025765      | 24711 | ggtcagggtagagagatttagcaaataaaaagcagaggacgccctgaaact     | 24760 |
| ENSOARG000000 | 21415 | TCAAACAGTTTTTCTAGTACATTTTCATGCAACGTGTTATCTGGCAGCCCT<br> | 21464 |
| KP025765      | 24761 | tcaaacagtttttctagtacatttcatgcaacgtgttatctggcagccct      | 24810 |
| ENSOARG000000 | 21465 | AGGCCAGAGCACTAGGCAGAACTCTATTTTTCTCCTGTCCTGGAAGGGAG<br>  | 21514 |
| KP025765      | 24811 | aggccagagcacttaggcagaactctatTTTTCTCCTGTCCTGGAAGGGAG     | 24860 |
| ENSOARG000000 | 21515 | AGATGACCCCTGCACTTGTGAGGACGGAAAACTTTTAGGGGAGCTCAGT<br>   | 21564 |
| KP025765      | 24861 | agatgacccctgcacttgtcaggacggaaaacttttcaggggagctcagt      | 24910 |
| ENSOARG000000 | 21565 | CCCCGACTCTTGCCTGGTACAGGGCCCTCCTCTCTGCATCCTCACATGTT<br>  | 21614 |
| KP025765      | 24911 | ccccgactcttgcctggtagcagggccctcctctctgcatcctcacatgtt     | 24960 |
| ENSOARG000000 | 21615 | CAGTCCATCCCAGGGATGGAGAGCTTCCCCTCCAGATACAACCTGTGG<br>    | 21664 |
| KP025765      | 24961 | cagtccatcccagggatggagagcttcccactcccagataacaacctgtgg     | 25010 |
| ENSOARG000000 | 21665 | ACCCTAAAGTGGGTGAGACTTAGCACTCCCAGGTGGCCCAACAGGGCAGA<br>  | 21714 |
| KP025765      | 25011 | accctaaagtgggtcagacttagcactcccaggtggcccaacagggcaga      | 25060 |
| ENSOARG000000 | 21715 | GGGCAGCAGGATTGTTCTGGGCCTCAGGCTCCTTGCTCTGTTACCTGGC<br>   | 21764 |
| KP025765      | 25061 | gggcagcaggattgttctgggcctcaggctccttgctctgttcacctggc      | 25110 |
| ENSOARG000000 | 21765 | TGACCAAGCACAACTTTTCAGCCGCTGCGTCACACCTTGGCTCCTGCTG<br>   | 21814 |
| KP025765      | 25111 | tgaccaagcacaaacttttcagccgctgctgctcacaccttggtcctgctg     | 25160 |
| ENSOARG000000 | 21815 | GCGACCCCTGATCCACGCCTGGACCACTGTCAGGAAGTCTTTTGTGGCCC<br>  | 21864 |
| KP025765      | 25161 | gcgacccctgatccacgcctggaccactgtcaggaagtcttttgtggccc      | 25210 |
| ENSOARG000000 | 21865 | GGTCTTTAATCTTAACCAGGCGTACTGATGATTCCGGCGCACAGTCTTA<br>   | 21914 |
| KP025765      | 25211 | ggtctttaatcttaaccaggcgtgactgatgattccggcgcacagtctta      | 25260 |
| ENSOARG000000 | 21915 | GCTCTTGCCTCACAACGTGTGAGGAAGCCCTCCTGACCAAGGGCATCA<br>    | 21964 |
| KP025765      | 25261 | gctcttgcctcacaacgtgtgaggaagccctcctgaccaagggcatca        | 25310 |
| ENSOARG000000 | 21965 | GCCCTTTGGGGTGGTCCCCTTCCCTTCTCCCCCTGGCAGACAGATGCGAC<br>  | 22014 |
| KP025765      | 25311 | gccctttgggggtggtccccttcccttctccccctggcagacagatgcgac     | 25360 |
| ENSOARG000000 | 22015 | AGGGTGGACCCACCTCAGCACTCAGAGGCTCCCCAGGCAGACAGTCC<br>     | 22064 |
| KP025765      | 25361 | agggtggacccacctcagcactcagaggcctccccaggcagacagtcc        | 25410 |
| ENSOARG000000 | 22065 | AACATCAGCCAGTTCTTGGAGCACAGCTATTCTTTATCAGACAGCATCA<br>   | 22114 |
| KP025765      | 25411 | aacatcagccagttcttggagcacagctattctttatcagacagcatca       | 25460 |
| ENSOARG000000 | 22115 | AACTTTGCAAGTGGGGTTTTCCCTGAGAGCCCTCCTTTGGACCCCTCGGA<br>  | 22164 |

|               |       |                                                     |       |
|---------------|-------|-----------------------------------------------------|-------|
|               |       |                                                     |       |
| KP025765      | 25461 | aacttttgcaagtggggttttccctgagagccctcctttggaccctcggga | 25510 |
| ENSOARG000000 | 22165 | CACTGAGATGTCTTCTGATCATCCAGAGAGCCCCATGTTGTCAGGTTGGG  | 22214 |
|               |       |                                                     |       |
| KP025765      | 25511 | cactgagatgtcttctgatcatccagagagccccatgttgtcaggttggg  | 25560 |
| ENSOARG000000 | 22215 | GCCCCTAGGCACTGTAACCTCACTCAGAGCAGCCTGGAGTCTCTTCCTTAC | 22264 |
|               |       |                                                     |       |
| KP025765      | 25561 | gcccctaggcactgtaactcactcagagcagcctggagtctcttccttac  | 25610 |
| ENSOARG000000 | 22265 | CCCTCCCAGGGCTGCATGTCTCCCTTCTGGGTGTGGGGGAGCTGCCTCA   | 22314 |
|               |       |                                                     |       |
| KP025765      | 25611 | ccctcccagggctgcatgtcctcccttctgggtgtgggggagctgcctca  | 25660 |
| ENSOARG000000 | 22315 | CCTCTGCTCCAGGCTAACTGGCTCTTGTGCAACCTCCATCCCACCTGGC   | 22364 |
|               |       |                                                     |       |
| KP025765      | 25661 | cctctgctccaggctaactggctcttgtgcaacctccatcccacctggc   | 25710 |
| ENSOARG000000 | 22365 | GCACTCGGCTCGTGCAGGCCTCGGCCTGGCTCGGCTGCAGGATCAGGCC   | 22414 |
|               |       |                                                     |       |
| KP025765      | 25711 | gcactcggctcgtgcaggcctcggcctggcctcggctgcaggatcaggcc  | 25760 |
| ENSOARG000000 | 22415 | TGCCTTCTCCTCCCATCCTTGCCAGGTGGCCAGGGCAGCCTTGCAAG     | 22464 |
|               |       |                                                     |       |
| KP025765      | 25761 | tgcccttctcctcccatccttggccaggtggccagggcagccttggcaag  | 25810 |
| ENSOARG000000 | 22465 | TGCCCGAATATCTCCACTTTTAAAATAGTTTTTATTTATTGTTTTGGTTG  | 22514 |
|               |       |                                                     |       |
| KP025765      | 25811 | tgcccgaatatctccacttttaaaatagtttttatttattgttttggtt   | 25860 |
| ENSOARG000000 | 22515 | TGCCAGGTCTTTGTGGGGGCATGCGGGATGATCAGTCTTTATCATGGCGC  | 22564 |
|               |       |                                                     |       |
| KP025765      | 25861 | tgccaggtctttgtggggcatgcgggatgatcagtctttatcatggcgc   | 25910 |
| ENSOARG000000 | 22565 | GCAGGATCTTTTCAGTTGTGGCCTGTGGGATCTGGGGCTTCCCTGGTGGC  | 22614 |
|               |       |                                                     |       |
| KP025765      | 25911 | gcaggatcttttcagttgtggcctgtgggatctggggcttccctggtggc  | 25960 |
| ENSOARG000000 | 22615 | TCAGTGGTAGAGAGTCCACCTGCCAATGCGGGAGATCTGGGTTAGTCCC   | 22664 |
|               |       |                                                     |       |
| KP025765      | 25961 | tcagtggtagagagtccacctgccaatgcgggagatctgggttcagtccc  | 26010 |
| ENSOARG000000 | 22665 | TGGGTCGGGAAGATCCCCTGGAGGAAGAAATGGCAACCCACTCCCGTGT   | 22714 |
|               |       |                                                     |       |
| KP025765      | 26011 | tgggtcgggaagatcccctggaggaagaaatggcaaccactcccgtgtt   | 26060 |
| ENSOARG000000 | 22715 | CTTGCTTGAAAATCCCATGGACAGAACAGCCTTGAGGGATCCATGGGGT   | 22764 |
|               |       |                                                     |       |
| KP025765      | 26061 | cttgcttgaaaatcccctggacagaacagccttgaggatccatgggggt   | 26110 |
| ENSOARG000000 | 22765 | CCCTCGAGAGTCCATGGGGTCGAAAAGACTTGACACAACCTGGCTGCT    | 22814 |
|               |       |                                                     |       |
| KP025765      | 26111 | ccctcgagagtccatggggtcgaaaagacttgacacaacttggtgct     | 26160 |
| ENSOARG000000 | 22815 | CAGCAACAACATGTAGGATCTAGTTCTTGACCAAGGATTGAACCCGGGT   | 22864 |
|               |       |                                                     |       |
| KP025765      | 26161 | cagcaacaacatgtaggatctagttcttgaccaaggattgaaccgggt    | 26210 |
| ENSOARG000000 | 22865 | CCCCTGCATTGGGAGAGCAAAGTCTTAGCCCCTGGACCACCAGGAAGTCC  | 22914 |
|               |       |                                                     |       |
| KP025765      | 26211 | cccctgcattgggagagcaaagtcttagccccctggaccaccaggaagtcc | 26260 |
| ENSOARG000000 | 22915 | CCAAATGTCTCCACTTTGGATTTCCCAACAGAGCATTGGGGTTTGGTTG   | 22964 |
|               |       |                                                     |       |

|               |       |                                                     |       |
|---------------|-------|-----------------------------------------------------|-------|
| KP025765      | 26261 | ccaaatgtctccactttggatttccaacagagcatttggggtttggtg    | 26310 |
| ENSOARG000000 | 22965 | GGGACGGTGAGGCCAGGTGGTGAGGGCACTCTTGGCTCTGGAGCCAGAC   | 23014 |
|               |       |                                                     |       |
| KP025765      | 26311 | gggacggtgaggcccaggtggtgagggcactcttggctctggagccagac  | 26360 |
| ENSOARG000000 | 23015 | TCGCACAGATGCACGTGAATGCAGGACCTTTACTAACGGGTCAAGGTGAC  | 23064 |
|               |       |                                                     |       |
| KP025765      | 26361 | tgcacagatgcacgtgaatgcaggaccttactaacgggtcaaggtgac    | 26410 |
| ENSOARG000000 | 23065 | ACGCGGCTGACTTGCCTTAGTGTCTCTGCCACTCAACTTAGCGATGA     | 23114 |
|               |       |                                                     |       |
| KP025765      | 26411 | acgcggtgacttgcgtctagtgtgtctctgccactcaacttagcgatga   | 26460 |
| ENSOARG000000 | 23115 | ACCCCGTGGAGCCCTGGTGACACTTCTCTAAGCCAGTCACACCCGTCAGG  | 23164 |
|               |       |                                                     |       |
| KP025765      | 26461 | accccgtggagcccctggtgacacttctctaagccagtcacacccgtcagg | 26510 |
| ENSOARG000000 | 23165 | GCTTGGCCCGTGGCTGGGCATCAACAGTTGCTCGCTCCTTGCCTTGTTC   | 23214 |
|               |       |                                                     |       |
| KP025765      | 26511 | gcttggcccgtggctgggcatcaacagttgctcgtccttgccttgttcc   | 26560 |
| ENSOARG000000 | 23215 | CCTGACCCCTGGGTGCAGTTCAAGGGCTGCGCGATGGTCCTGGGGCATCC  | 23264 |
|               |       |                                                     |       |
| KP025765      | 26561 | cctgaccctgggtgcagtcaagggctgcgcatggtcctggggcatcc     | 26610 |
| ENSOARG000000 | 23265 | GAGACCAGGACCAGGCTGGAAGCTAGACGATCCCCCTGAGGCNNNNNNNN  | 23314 |
|               |       |                                                     |       |
| KP025765      | 26611 | gagaccaggaccaggtggaagctagacgatccccctgaggc-----      | 26652 |
| ENSOARG000000 | 23315 | NNNNNNNNNNNNNNNNNNNNNNNNNNNNNNNNNNNNNNNNNNNNNNNNNN  | 23364 |
| KP025765      | 26653 | -----                                               | 26652 |
| ENSOARG000000 | 23365 | NNNNNNNNNNNNNNNNNNNNNNNNNNNNNNNNNNNNNNNNNNNNNNNN--  | 23406 |
| KP025765      | 26653 | -----actctccc                                       | 26660 |
| ENSOARG000000 | 23407 | -----                                               | 23406 |
| KP025765      | 26661 | tgccccaggaccattgggccatgaagaaggtgctggtggacggcccca    | 26710 |
| ENSOARG000000 | 23407 | -----                                               | 23406 |
| KP025765      | 26711 | agaagcggacgctgctcatcgagaacctgcgagtgccagccataccgc    | 26760 |
| ENSOARG000000 | 23407 | -----                                               | 23406 |
| KP025765      | 26761 | tacacagtcaaggctcgcaacggggcaggctgggggcctgagcgggaggc  | 26810 |
| ENSOARG000000 | 23407 | -----                                               | 23406 |
| KP025765      | 26811 | catcatcaacctggccaccagcccaagcgacccatgtccagtgagcagg   | 26860 |
| ENSOARG000000 | 23407 | -----                                               | 23406 |
| KP025765      | 26861 | gggcagggaggcacagggtggacagggacgggcaggggcctgagatctgg  | 26910 |
| ENSOARG000000 | 23407 | -----                                               | 23406 |
| KP025765      | 26911 | gccctggctcacctccccccaccccgagtcctccatcatccctgacatc   | 26960 |
| ENSOARG000000 | 23407 | -----                                               | 23406 |
| KP025765      | 26961 | cccatcgtggacgccagagtggggaggactacgagagcttctcatgta    | 27010 |

|               |       |                                                    |       |
|---------------|-------|----------------------------------------------------|-------|
| ENSOARG000000 | 23407 | -----                                              | 23406 |
| KP025765      | 27011 | cagcgatgacgtgctccgctctccggccggcagccagaggcccagcgtct | 27060 |
| ENSOARG000000 | 23407 | -----                                              | 23406 |
| KP025765      | 27061 | ctgatgacaccggtgagtgggcccgggatcccggcgaggatggtgggggt | 27110 |
| ENSOARG000000 | 23407 | -----                                              | 23406 |
| KP025765      | 27111 | cctgagtagagggtggggctgtcgtggtgtccagagacagcaaaggggc  | 27160 |
| ENSOARG000000 | 23407 | -----                                              | 23406 |
| KP025765      | 27161 | cagtgaccactgggcaagaagatcaagactgaaagtcccctctctgcaca | 27210 |
| ENSOARG000000 | 23407 | -----                                              | 23406 |
| KP025765      | 27211 | atcaacgatttgacgggcaccattctggctctgggtacaaaggacaaagc | 27260 |
| ENSOARG000000 | 23407 | -----                                              | 23406 |
| KP025765      | 27261 | cgacatggctcataggactggtgtgcacgtctctgtgtgaggacagacag | 27310 |
| ENSOARG000000 | 23407 | -----                                              | 23406 |
| KP025765      | 27311 | acagacatgggtttgggacacatgcacacgggctcgtgcacatgagactg | 27360 |
| ENSOARG000000 | 23407 | -----                                              | 23406 |
| KP025765      | 27361 | gaaacagctgtgagagtggaaggctcaccagctgtgcatggagttagga  | 27410 |
| ENSOARG000000 | 23407 | -----                                              | 23406 |
| KP025765      | 27411 | cacctcccaggacagggttacaggcgaggaggcaagcctggtccgggag  | 27460 |
| ENSOARG000000 | 23407 | -----                                              | 23406 |
| KP025765      | 27461 | cccagaatagcgattggcttgggggccccagagcagtgtccttgac     | 27510 |
| ENSOARG000000 | 23407 | -----                                              | 23406 |
| KP025765      | 27511 | tggccctgctccacttccctcttgattcctgtacagtgtgatgcaaaga  | 27560 |
| ENSOARG000000 | 23407 | -----                                              | 23406 |
| KP025765      | 27561 | gccccgactgggactcctggggtctattttagctctggcttactgccg   | 27610 |
| ENSOARG000000 | 23407 | -----                                              | 23406 |
| KP025765      | 27611 | acggcttccctttagctcagttggtaaagagtctgcctgcaatgcagga  | 27660 |
| ENSOARG000000 | 23407 | -----                                              | 23406 |
| KP025765      | 27661 | gacctgggttcaattcctgggttgaaagatcccctggagaaggaaatgg  | 27710 |
| ENSOARG000000 | 23407 | -----                                              | 23406 |
| KP025765      | 27711 | caaccactccagtattctggcctggagaaccccatggacagaggacct   | 27760 |
| ENSOARG000000 | 23407 | -----TCCATGGGGTCTATGGGGCAAGAGTTGGACAGGACTTA        | 23444 |
|               |       |                                                    |       |
| KP025765      | 27761 | ggcaggccacagtccatggggtctatggggcaagagttggacaggactta | 27810 |

|               |       |                                                     |       |
|---------------|-------|-----------------------------------------------------|-------|
| ENSOARG000000 | 23445 | GTGACTAAACCACCACTGTGGGAATTCAGATGAATCACATACATTCTCTG  | 23494 |
|               |       |                                                     |       |
| KP025765      | 27811 | gtgactaaaccaccactgtgggaattcagatgaatcacatacatttctctg | 27860 |
| ENSOARG000000 | 23495 | CCTCAGTTTTCTGATCTGTGAAATGGGATGCCAATCATACTAGGCTGAGT  | 23544 |
|               |       |                                                     |       |
| KP025765      | 27861 | cctcagttttctgatctgtgaaatgggatgccaatcatactaggctgagt  | 27910 |
| ENSOARG000000 | 23545 | AAAAATCCAGCAGGATTTGTATTTCTTTTTATATAATTTATTTTCGGCT   | 23594 |
|               |       |                                                     |       |
| KP025765      | 27911 | aaaaatccagcaggatTTgtatTTcTTTTatataatTTatTTtccggct   | 27960 |
| ENSOARG000000 | 23595 | GTGCTGGGTCTTCATTGCTATGCAGGCTTCTCATCCCAGTGGCTTCTCTT  | 23644 |
|               |       |                                                     |       |
| KP025765      | 27961 | gtgctgggtcttctattgctatgcaggcttctcatcccggctgcttctctt | 28010 |
| ENSOARG000000 | 23645 | ACTGTGGAGCAAGACGGGCTCTAGGGCTTAGTAGTTGCAACTCCTGGGCT  | 23694 |
|               |       |                                                     |       |
| KP025765      | 28011 | actgtggagcaagacgggctctagggttagtagttgcaactcctgggct   | 28060 |
| ENSOARG000000 | 23695 | CTAGAGCAGTTACCCCGCGCATGCAGGATCTTCCCTGTTTCAGTTCAGTT  | 23744 |
|               |       |                                                     |       |
| KP025765      | 28061 | ctagagcagttaccccgcgcatgcaggatcttccctgttcagttcagtt   | 28110 |
| ENSOARG000000 | 23745 | CAGTTTGGTTCGGTCACAGACCAGGGATCAAACCTGTTTTTCCCCATGG   | 23794 |
|               |       |                                                     |       |
| KP025765      | 28111 | cagtttggttccgtcacagaccagggtcaaactgTTTTtccccatgg     | 28160 |
| ENSOARG000000 | 23795 | GGAGGTAGATTCTTTACCATTGAGCCATCAGGGAAGCCCCAGGATTTGTA  | 23844 |
|               |       |                                                     |       |
| KP025765      | 28161 | ggaggtagattctttaccattgagccatcaggaagccccaggatttcta   | 28210 |
| ENSOARG000000 | 23845 | TTTTCATCCTTCTTTACCTACATCAGGCTTCCATGGAGTCAAGCTAGGGT  | 23894 |
|               |       |                                                     |       |
| KP025765      | 28211 | ttttcatccttctttacctacatcaggcttccatggagtcaagctagggt  | 28260 |
| ENSOARG000000 | 23895 | TCAGGGGTCTTGAGGGTTTTGAGGGTCTGGAGTAGAGAGCAGCTGGTATG  | 23944 |
|               |       |                                                     |       |
| KP025765      | 28261 | tcaggggtcttgagggttttgagggtctggagtagagagcagctggtatg  | 28310 |
| ENSOARG000000 | 23945 | AATCAGGTTCTCAGCTTGTCGGCACACAGATCTACTCCGCCCGCTG      | 23994 |
|               |       |                                                     |       |
| KP025765      | 28311 | aatcaggttctcagcttgcggcaccacacagatctactccgcccgtg     | 28360 |
| ENSOARG000000 | 23995 | GAACACGCTGGGAGGCAGGCTGGGGAGACATCACTCCCTCCCTCATCCAT  | 24044 |
|               |       |                                                     |       |
| KP025765      | 28361 | gaacacgctgggaggcaggctggggagacatcactccctccctcatccat  | 28410 |
| ENSOARG000000 | 24045 | ACGGGATGCAGGCTCAGAGCAGAGGCCTCACGGCTCGCGGCACAGCCAGG  | 24094 |
|               |       |                                                     |       |
| KP025765      | 28411 | acgggatgcaggctcagagcagaggcctcacggctcgcggcacagccagg  | 28460 |
| ENSOARG000000 | 24095 | GCTCTGGTCCAGAGGTCTTCCCTCGCCAGCTGCGGCCAGCCGCCCTC     | 24144 |
|               |       |                                                     |       |
| KP025765      | 28461 | gctctggtccagagggtcttccctcgccagctgcgggccaggccgccctc  | 28510 |
| ENSOARG000000 | 24145 | TAACACCTC-----                                      | 24153 |
|               |       |                                                     |       |
| KP025765      | 28511 | taacacctcggggctgagggtcccgcctgcccgggctcccgcaccgcc    | 28560 |
| ENSOARG000000 | 24154 | -----                                               | 24153 |
| KP025765      | 28561 | gcacaccagatcgcagtgccgggggaccaccggctttttctccgcgcc    | 28610 |
| ENSOARG000000 | 24154 | -----                                               | 24153 |



|               |       |                                                         |       |
|---------------|-------|---------------------------------------------------------|-------|
| KP025765      | 28611 | ctggcgccccctggcggtgccaacgcggcccttcgttgttcctaaggctg      | 28660 |
| ENSOARG000000 | 24154 | -----                                                   | 24153 |
| KP025765      | 28661 | cggctggaagttcgagcccctgctgggggaggagctggacctgcggcgcg      | 28710 |
| ENSOARG000000 | 24154 | -----                                                   | 24153 |
| KP025765      | 28711 | tcacgtggcggtgccccggagctcatcccgcgcctgtccgctggcagc        | 28760 |
| ENSOARG000000 | 24154 | -----                                                   | 24153 |
| KP025765      | 28761 | cggcgctcctccgactccgggccccgggagacggcaccgccgatggggg       | 28810 |
| ENSOARG000000 | 24154 | -----                                                   | 24153 |
| KP025765      | 28811 | cgcgcgggcgccagcggggaggaggtgaccggcatgccccaccgca          | 28860 |
| ENSOARG000000 | 24154 | -----                                                   | 24153 |
| KP025765      | 28861 | cccacctcggctccagccagagcccaccgcagccaggctgccttgcccgg      | 28910 |
| ENSOARG000000 | 24154 | -----                                                   | 24153 |
| KP025765      | 28911 | tgacccagagccaggggacctcccagggcggggccgactgctggggct        | 28960 |
| ENSOARG000000 | 24154 | -----                                                   | 24153 |
| KP025765      | 28961 | gcaaggccctggcgaaggtcgggtccgtgggggcctcctgccaggccagg      | 29010 |
| ENSOARG000000 | 24154 | -----TGTTCCAGAAGCCTGCGGGCGTTGGGGGGGCTGTGGACTCCTC        | 24196 |
| KP025765      | 29011 | <br>ggacctgtgttccagaagcctgcgggcgttgggggggctgtggactcctc  | 29060 |
| ENSOARG000000 | 24197 | CAGGGGCCTCTGTCCCTGGTGGGCAGAGGGAGGCTGGGTGTTTTGATGCC      | 24246 |
| KP025765      | 29061 | <br>caggggcctctgtccctggtgggcagagggaggctgggtgtttgatgcc   | 29110 |
| ENSOARG000000 | 24247 | AGGGGGCCCCGGTAGGTAGGTAACCCCTGGAActCCCAGGGCTGCAGCA       | 24296 |
| KP025765      | 29111 | <br>aggggg-ccccggtaggtaggtaacccctggaactcccagggtgcagca   | 29159 |
| ENSOARG000000 | 24297 | GCCCCCCCCTCGGGCTCCGGGTCTGCGGCCGGGCCTGTGGGAGTGACC        | 24346 |
| KP025765      | 29160 | <br>gccccccccctcggggctccggggtctgcggccgggcctgtgggagtacc  | 29209 |
| ENSOARG000000 | 24347 | CTGCCCTGTCCCCGAGACACCTGGTGAACGGGCGAATGGACTTTGCCT        | 24396 |
| KP025765      | 29210 | <br>ctgccctgtccccgagagcacctggtgaacgggccaatggactttgcct   | 29259 |
| ENSOARG000000 | 24397 | TCCCTGGCAGCGCAACTCCCTGCACAGGATGACCGTGAGCACCGCCGCC       | 24446 |
| KP025765      | 29260 | <br>tccctggcagcgccaactccctgcacaggatgaccgtgagcaccgccgcc  | 29309 |
| ENSOARG000000 | 24447 | CACGGCGCCCACCTGAGCCCGCAGCTGTCCCACCGCATGCTGAGCACCTC      | 24496 |
| KP025765      | 29310 | <br>cacggcgccccacctgagcccgcagctgtcccaccgcatgctgagcacctc | 29359 |
| ENSOARG000000 | 24497 | GTCCACCCTCACGCGGGACTACCACTCGCTGACGCGCACGGAGCACTCGC      | 24546 |
| KP025765      | 29360 | <br>gtccaccctcacgcgggactaccactcgtgacgcgcacggagcactcgc   | 29409 |
| ENSOARG000000 | 24547 | ACTCCGCCACGCTGCCAGGGACTACTCCACCCTCACCTCCCTCTCCTCC       | 24596 |
|               |       |                                                         |       |

|               |       |                                                    |       |
|---------------|-------|----------------------------------------------------|-------|
| KP025765      | 29410 | actccgccacgctgcccagggactactccaccctcacctccctctcctcc | 29459 |
| ENSOARG000000 | 24597 | CAGAGTGAGTGCCGCTCCTCCCTGGCCCTCCGGCCAGGCCCTCCCCCT   | 24646 |
| KP025765      | 29460 |                                                    | 29509 |
| ENSOARG000000 | 24647 | TCCCCCCCCCTGCGGCGTGACCAGGGCCTGTGTCCCACGCTGCCCCCG   | 24696 |
| KP025765      | 29510 |                                                    | 29558 |
| ENSOARG000000 | 24697 | TCCAACACGCACACCTGCCCCAGCTCACTCATGTTTTGTCTGCCCTAGG  | 24746 |
| KP025765      | 29559 |                                                    | 29608 |
| ENSOARG000000 | 24747 | CCTCCCTCCCATCTGGGAACACGGGAGGAGCAGGCTTCCATTGTCCTGGG | 24796 |
| KP025765      | 29609 |                                                    | 29658 |
| ENSOARG000000 | 24797 | CCCTGGGGTCCCGGAGTCGGGCTCAGATGAACGGGGCCCCCGCTCCGAG  | 24846 |
| KP025765      | 29659 |                                                    | 29708 |
| ENSOARG000000 | 24847 | GACTCAAGAGACTCTATAATCCTGGCTGGGCAGCCAGCAGCGCCCTCGTG | 24896 |
| KP025765      | 29709 |                                                    | 29758 |
| ENSOARG000000 | 24897 | GGGCCAGGTAGTACAGGGGTGGCCGTCTGCGTCTCCATGGCCTTCCAG   | 24946 |
| KP025765      | 29759 |                                                    | 29808 |
| ENSOARG000000 | 24947 | CTCCATGTCACCATCCTCCCACCATCAGCACTGCCACGCCTCCTCACCC  | 24996 |
| KP025765      | 29809 |                                                    | 29858 |
| ENSOARG000000 | 24997 | TCCATTCCATCCACATCCATGCTGGTGCCTAAAGCGGCTGTCCTCCTGCG | 25046 |
| KP025765      | 29859 |                                                    | 29908 |
| ENSOARG000000 | 25047 | GTGCTGGGCTGGGGCTGGGGCAAGAGAGGGGCCAGCTGAGGGTGGGGGGC | 25096 |
| KP025765      | 29909 |                                                    | 29958 |
| ENSOARG000000 | 25097 | CGGCCACTCAAGCGGAGCCTGCACCCACCTGAGTGTGGTGGGGAGGCACT | 25146 |
| KP025765      | 29959 |                                                    | 30008 |
| ENSOARG000000 | 25147 | GGGCGGCTTAGAGAGGGTGCTGCAGGGCTGAGTGGGCTGCCCGCCAGCA  | 25196 |
| KP025765      | 30009 |                                                    | 30058 |
| ENSOARG000000 | 25197 | GTCAGGGAGGTGCGGCTGAGAACCAGGGACTCCTGCCAGACACCCCGC   | 25246 |
| KP025765      | 30059 |                                                    | 30108 |
| ENSOARG000000 | 25247 | TGGGGGCTGACTGTGGCCTCCCCATCTGCAGGCTCCCGCCTGGCTGCGG  | 25296 |
| KP025765      | 30109 |                                                    | 30158 |
| ENSOARG000000 | 25297 | GCG-----GCCGCCTGGTGTCTCCGCCCTCGGACCCACG            | 25331 |
| KP025765      | 30159 |                                                    | 30208 |
| ENSOARG000000 | 25332 | TCTCTGAAAGTGAGCTGGCAGGAGCCGAGTGTGAGCGTGCCTGCAGGG   | 25381 |
| KP025765      | 30209 |                                                    | 30258 |

|               |       |                                                     |       |
|---------------|-------|-----------------------------------------------------|-------|
| ENSOARG000000 | 25382 | CTACAGTGTGGAGTACCAGCTGCTGAACGGCGGTGAGGCCTGGCTGCTGG  | 25431 |
|               |       |                                                     |       |
| KP025765      | 30259 | ctacagtgtggagtaccagctgctgaacggcggtgaggcctggctgctgg  | 30308 |
| ENSOARG000000 | 25432 | CGGGCTGACACACAGGGGCTCCGCGGGGC-----CCCCGCCGAGC       | 25472 |
|               |       |                                                     |       |
| KP025765      | 30309 | cgggctgacacacaggggctc----gggctgtctggagcccag-cgagc   | 30353 |
| ENSOARG000000 | 25473 | CGCTTGACCACTGATGCCCCGCTGCCACCCCTGCCTCTCTGAGAGGGC    | 25522 |
|               |       |                                                     |       |
| KP025765      | 30354 | cgcttgaccactgatgccccgctgccaccccctgcctctctgagagggc   | 30403 |
| ENSOARG000000 | 25523 | CTTTCCTTCCGAGCCCCCACTGTCCCCTTCACTGCGTCCACTCTTCCG    | 25572 |
|               |       |                                                     |       |
| KP025765      | 30404 | ctttcccttccgagcccccaactgtccccttcaactgctccactcttccg  | 30453 |
| ENSOARG000000 | 25573 | CTGTATCCTCATCCGTCTCCCTGGGCTCGCTCCGTATCACTTCCCCGC    | 25622 |
|               |       |                                                     |       |
| KP025765      | 30454 | ctgtatcctcatccgtctccctgggcctcgtccgtatcacttccccgc    | 30503 |
| ENSOARG000000 | 25623 | GAGGTTTTGCTTAGGGACCCAGGCCTCTCTGCTGGGCCTATGAGAAGTG   | 25672 |
|               |       |                                                     |       |
| KP025765      | 30504 | gaggttttgcttagggaccaggcctctctgctgggcctatgagaagtg    | 30553 |
| ENSOARG000000 | 25673 | GCCCTTTTCTGGGCAGGCATGACCTGGGCCATAAACAGCTATCATACAC   | 25722 |
|               |       |                                                     |       |
| KP025765      | 30554 | gcccttttctgggcaggcatgacctgggccataaacagctatcatcac    | 30603 |
| ENSOARG000000 | 25723 | AGATGAGATTTTCAATTCCACTCCTTGTCTAGTGCACAACCTGAACCACC  | 25772 |
|               |       |                                                     |       |
| KP025765      | 30604 | agatgagattttcagattccactccttgtctagtgcacaacctgaaccacc | 30653 |
| ENSOARG000000 | 25773 | AACCACACCACACAAGGCCGCCCCACCTGTACCCCAACCACAGCC----   | 25818 |
|               |       |                                                     |       |
| KP025765      | 30654 | aaccacaccacacaaggccgccccacctgtacccaaccacagccggtc    | 30703 |
| ENSOARG000000 | 25819 | --GGCGGGGGGAGGACCAGGTCTGGGCTGTGGCCTAGGGGAGGGGCGGGA  | 25866 |
|               |       | .                                                   |       |
| KP025765      | 30704 | ctggctgggggaggaccaggtctgggctgtggcctaggggaggggcgggga | 30753 |
| ENSOARG000000 | 25867 | TCAAGCCGGGGCTAGGGATGAGGAATGAGGCTGCTCTGCTGTCTGCCCC   | 25916 |
|               |       |                                                     |       |
| KP025765      | 30754 | tcaagccggggctagggatgaggaatgaggctgctctgctgtctgcccc   | 30803 |
| ENSOARG000000 | 25917 | GTCGCCACCCAGGTGAGCTGCATCGCCTCAACATCCCCAGCCCCAGCCA   | 25966 |
|               |       |                                                     |       |
| KP025765      | 30804 | gtcgcccaccaggtgagctgcatcgcctcaacatccccagccccagcca   | 30853 |
| ENSOARG000000 | 25967 | GACCTCGGTGGTGGTGGAGGACCTCCTGCCCAACCACTCGTATGTGTCC   | 26016 |
|               |       |                                                     |       |
| KP025765      | 30854 | gacctcggtggtggtggaggacctcctgccaaccactcgtatgtgttcc   | 30903 |
| ENSOARG000000 | 26017 | GCGTGCGGGCCAGAGCCAGGAGGGCTGGGGCCAGAGCGGAGGGTGTC     | 26066 |
|               |       |                                                     |       |
| KP025765      | 30904 | gcgtgcgggcccagagccaggagggctggggcccagagcgcgaggggtgtc | 30953 |
| ENSOARG000000 | 26067 | ATCACCATTGAGTCCCAGGTGCACCCGAGAGCCCGCTCTGCCCCCTGCC   | 26116 |
|               |       |                                                     |       |
| KP025765      | 30954 | atcaccattgagtcccaggtgcacccgagagcccgtctgccccctgcc    | 31003 |
| ENSOARG000000 | 26117 | GGGTGAGTTGCCACCCCAACCCGCGGGTGCCCTGCCTGGCCCTCAGG     | 26166 |
|               |       |                                                     |       |
| KP025765      | 31004 | gggtgagttgccacccccacaccgcggtgcccctgcctggccctcagg    | 31053 |

|               |       |                                                    |       |
|---------------|-------|----------------------------------------------------|-------|
| ENSOARG000000 | 26167 | TACCCACCTGTCCCCTGACAAGCTTCCTCGACTGCCCCCAGGCTCCGCCT | 26216 |
|               |       |                                                    |       |
| KP025765      | 31054 | taccacactgtcccctgacaagcttcctcgactgccccca-gctccgcct | 31102 |
| ENSOARG000000 | 26217 | TCACTTTGAGCACACCCAGTGCCCCGGGCCACTGGTGTTCACTGCCCTG  | 26266 |
|               |       |                                                    |       |
| KP025765      | 31103 | tcactttgagcacaccagtgccccgggcccactggtgttactgccctg   | 31152 |
| ENSOARG000000 | 26267 | AGCCCCGACTCACTGCAGCTGAGCTGGGAGCGGCCCGCAGGCCGGATGG  | 26316 |
|               |       |                                                    |       |
| KP025765      | 31153 | agccccgactcactgcagctgagctgggagcggccccgcaggccgatgg  | 31202 |
| ENSOARG000000 | 26317 | CGACATTCTGGGCTACCTGGTGACGTGTGAGATGGCCATGGAGGAGGTG  | 26366 |
|               |       |                                                    |       |
| KP025765      | 31203 | cgacattctgggctacctggtgacgtgtgagatggccatggaggaggtg  | 31252 |
| ENSOARG000000 | 26367 | CTGCCACCCCGGTTGGGGGCGGGGGGGGGGGGG--GGGAGCCGC       | 26414 |
|               |       |                                                    |       |
| KP025765      | 31253 | ctgcccacccgggttggggggcgggggggggtgtggacaggagccgc    | 31302 |
| ENSOARG000000 | 26415 | AGAGGCTGAAAGGCATCTTCCCTGCCAGAGCCAGCCACCACGTTCCCTGG | 26464 |
|               |       |                                                    |       |
| KP025765      | 31303 | agaggctgaaagcatcttccctgcccagagccagccaccacgttcctgg  | 31352 |
| ENSOARG000000 | 26465 | TTGACGGCGACAGCCCCGAGAGCCGGCTGACCGTGCCCGCCTCAGCGAG  | 26514 |
|               |       |                                                    |       |
| KP025765      | 31353 | ttgacggcgacagccccgagagccggctgaccgtgcccggcctcagcgag | 31402 |
| ENSOARG000000 | 26515 | AACGTGCCCTACAAGTTCAAGGTGCAGGCAAAGACCACCAAGGCTTCGG  | 26564 |
|               |       |                                                    |       |
| KP025765      | 31403 | aacgtgccctacaagttcaaggtgcaggcaaagaccaccaaggcttcgg  | 31452 |
| ENSOARG000000 | 26565 | GCCGGAGCGTGAAGGAATCATCACCATCGAGTCCCAGGATGGAGGCAGGC | 26614 |
|               |       |                                                    |       |
| KP025765      | 31453 | gccggagcgtgaaggaatcatcaccatcgagtcccaggatggaggcaggc | 31502 |
| ENSOARG000000 | 26615 | TTCTTTGCCCTTCCCCAGCCCTGCCCTTCTCTGGCCACACCTTCTCCT   | 26664 |
|               |       |                                                    |       |
| KP025765      | 31503 | ttctttgccccttccccagccctgccccttctctggccacaccttctct  | 31552 |
| ENSOARG000000 | 26665 | GGCACCATCTCTCCCTGCGCCCC-----GGACCCTTCCC            | 26700 |
|               |       |                                                    |       |
| KP025765      | 31553 | ggcaccatcctctaactgcgccccaccaccctctccaggaccctccc    | 31602 |
| ENSOARG000000 | 26701 | ACAGCTGGGCGGCCACTTGGGACTCTTCCAGCACCCAGCATCAGGGGAAT | 26750 |
|               |       |                                                    |       |
| KP025765      | 31603 | acagctgggcggccacttgggactcttccagcaccagcatcaggggaat  | 31652 |
| ENSOARG000000 | 26751 | ACAGCAGCATCACCACCCACTCCAGCACCACTGAGCCCTTCTACTGGGT  | 26800 |
|               |       |                                                    |       |
| KP025765      | 31653 | acagcagcatcaccaccactccagcaccactgagcccttctactgggt   | 31702 |
| ENSOARG000000 | 26801 | GAGTTGCCAGTGGGGCCCCCTGGCTCTTCCCAGGAAACACAGAGCTAAC  | 26850 |
|               |       |                                                    |       |
| KP025765      | 31703 | gagttgcccagtggggccccctggctcttcccaggaaacacagagctaac | 31752 |
| ENSOARG000000 | 26851 | AGAGGAAGGGGTGAGGC-----GGGGGGGGGACAGGCAGGACCCAG     | 26894 |
|               |       |                                                    |       |
| KP025765      | 31753 | agaggaaggggtcagggcgggggggggggacagtccaggaccaggggta  | 31802 |
| ENSOARG000000 | 26895 | -----TCTTCCCCTGCAGATGGACTGACCCTGGGCTCCCAG          | 26930 |
|               |       |                                                    |       |
| KP025765      | 31803 | ggtccttcaacgcttcttcccctgcagatggactgaccctgggctcccag | 31852 |
| ENSOARG000000 | 26931 | CACCTGGAAGCAAGTGGCTCCCTCACCCGGCATGTGACACAGGAGTTTGT | 26980 |

|               |       |                                                     |       |
|---------------|-------|-----------------------------------------------------|-------|
|               |       |                                                     |       |
| KP025765      | 31853 | cacctggaagcaagtggctccctcaccggcatgtgacacaggagtgtgt   | 31902 |
| ENSOARG000000 | 26981 | GAGCCGGACGCTGACCACCAGTGGGACCTCAGCACCCACGTGGACCAAC   | 27030 |
|               |       |                                                     |       |
| KP025765      | 31903 | gagccggacgctgaccaccagtgggaccctcagcaccacgtggaccaac   | 31952 |
| ENSOARG000000 | 27031 | AGTTCTTCCAGACCTGAGCTCCCCAACCTACACACACACCCCGCTCCA    | 27080 |
|               |       |                                                     |       |
| KP025765      | 31953 | agttcttccagacctgagctccccaaccctacacacacacccccgctcca  | 32002 |
| ENSOARG000000 | 27081 | CCCCAACCCAGGCGCTGCCTCAGCTACTCCATCCTTGGACTCCTGGTGG   | 27130 |
|               |       |                                                     |       |
| KP025765      | 32003 | ccccaaccccaggcgtgcctcagctactccatccttggactcctggtgg   | 32052 |
| ENSOARG000000 | 27131 | CCTGGCCCAGCCACATGCTGATCACAAGGCCGCTGCCTCTGGCCACAGTG  | 27180 |
|               |       |                                                     |       |
| KP025765      | 32053 | cctggcccagccacatgctgatcacaaggccgctgcctctggccacagtg  | 32102 |
| ENSOARG000000 | 27181 | CAGGGGCTCAGTGTCTCTGGACGGCATGGAGGGGGCAGAGTCCCGGAA    | 27230 |
|               |       |                                                     |       |
| KP025765      | 32103 | caggggctcagtgctcctctggacggcatggagggggcagaggtcccggaa | 32152 |
| ENSOARG000000 | 27231 | GGCCCTTCTGGCTGCCCCCCTGCCCCGGCCCCAGCCCCTTTGTAACCA    | 27280 |
|               |       |                                                     |       |
| KP025765      | 32153 | ggcccttctggctgccccctgccccggccccagccccctttgtaacca    | 32202 |
| ENSOARG000000 | 27281 | AAGAGCTGGACCCAGCATGGCAAGGGCTTGGCTTTGTTCTGCACTATAAT  | 27330 |
|               |       |                                                     |       |
| KP025765      | 32203 | aagagctggaccagcatggcaagggcttggctttgttctgactataat    | 32252 |
| ENSOARG000000 | 27331 | AAAGGATTTGCTACTGCTTGCTCTGCCCTGACCGTGTCTCTAGGCCCT    | 27380 |
|               |       |                                                     |       |
| KP025765      | 32253 | aaaggatttcgctactgcttggctctgccctgaccgtgtctctaggccct  | 32302 |
| ENSOARG000000 | 27381 | GTCCAGAGCAGGGAGTGGTTCTCACACCCCCCTTTTCTGATGCCCCAGCA  | 27430 |
|               |       |                                                     |       |
| KP025765      | 32303 | gtccagagcagggagtgttctcacaccccccttttctgatgccccagca   | 32352 |
| ENSOARG000000 | 27431 | CACATACACCTCTTGAAGCAGGCAGGCATCAGAGTCAGATACAAGTTTAT  | 27480 |
|               |       |                                                     |       |
| KP025765      | 32353 | cacatacacctcttgaggcaggcaggcatcagagtcagatacaagtttat  | 32402 |
| ENSOARG000000 | 27481 | TGAGCACCCAGACAGGAGGGAGGCCCGCCGTGTGCTGTCCCGCGATGG    | 27530 |
|               |       |                                                     |       |
| KP025765      | 32403 | tgagcaccagacaggagggaggccccgctgtgctgtccccggcgatgg    | 32452 |
| ENSOARG000000 | 27531 | CCTCATAAGCGCAGCACCTTGCGCCGTCAGCCGCCTGGGAGAGGTAGAA   | 27580 |
|               |       |                                                     |       |
| KP025765      | 32453 | cctcataagcgcagcaccttggcgccgtcagccgcctgggagaggtagaa  | 32502 |
| ENSOARG000000 | 27581 | GGTGGCGGTCCCATGGTACTGCTCCTGCCGGGGATGGGGGTCTGAGCT    | 27630 |
|               |       |                                                     |       |
| KP025765      | 32503 | ggtggcggtcccatggtactgctcctgccggggatgggggtctgagct    | 32552 |
| ENSOARG000000 | 27631 | CGGGGGGCCCTGGGAGC-----                              | 27647 |
|               |       |                                                     |       |
| KP025765      | 32553 | cggggggccctgggagcccatccctcctgctcccttgcctccccctccc   | 32602 |
| ENSOARG000000 | 27648 | -----                                               | 27647 |
|               |       |                                                     |       |
| KP025765      | 32603 | tcgactccagcactgccaacctggatgtgctgcatcaccgaggagcggc   | 32652 |
| ENSOARG000000 | 27648 | -----                                               | 27647 |

KP025765 32653 ggaggcctccagcagggtcaccgtgcagccccaaagccaccgcccgtca 32702  
ENSOARG000000 27648 ----- 27647  
KP025765 32703 tgcggctgccataaaccggcgaggagcgcggcctccaccagctga 32752  
ENSOARG000000 27648 ----- 27647  
KP025765 32753 tccagctccgggcagctcacctcgtagtcgtctctgtggagagaatacgg 32802  
ENSOARG000000 27648 ----- 27647  
KP025765 32803 agcctggagccagccccagctgcaacacgtgtgct 32837

#-----  
#-----
