# Supplementary material for: Combining GWAS and RNA-Seq Approaches for Detection of the Causal Mutation for Hereditary Junctional Epidermolysis Bullosa in Sheep
Source: PubMed Central journal article supplement (PMC4425408; doi:10.1371/journal.pone.0126416), 2015-05-08
Supplement: pone.0126416.s002.pdf [file pone.0126416.s002.pdf]

## File S2. Examples of rapid genotyping methods for the detection of JEB-carriers.

- 1.- **Fluorescent fragment length analysis.** A 243 bp PCR fragment including the regions carrying the mutation was amplified. Wild-type animals shows a 243 bp fragment (+/+), JEB-affected animals (EB/EB) display a unique 239 bp fragment (EB/EB) and both fragments could be identified in carriers (+/EB).

EB/EB

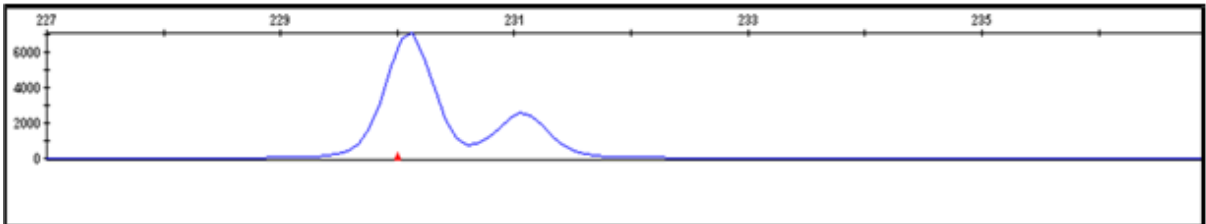

EB/+

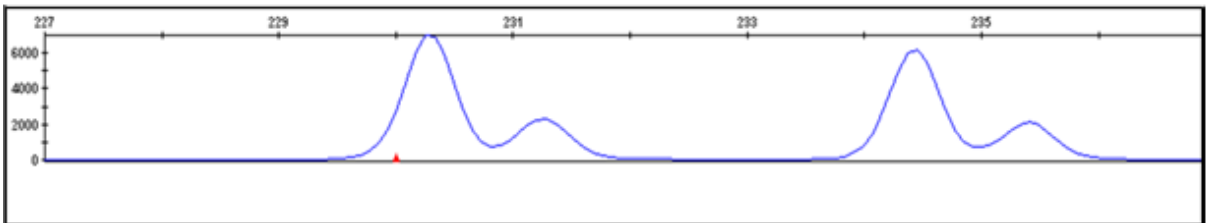

+/+

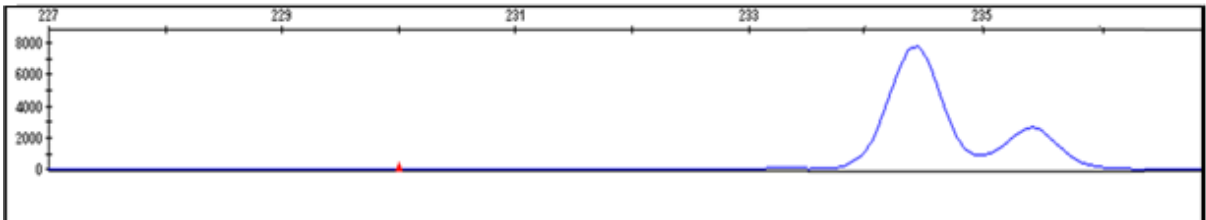

## 2.- Restriction fragment length polymorphism analysis.

Proposed endonucleases for the analysis in wild-type and mutated sequences.

### A.) Restriction map analysis of wild-type sequence (*PshAI*)

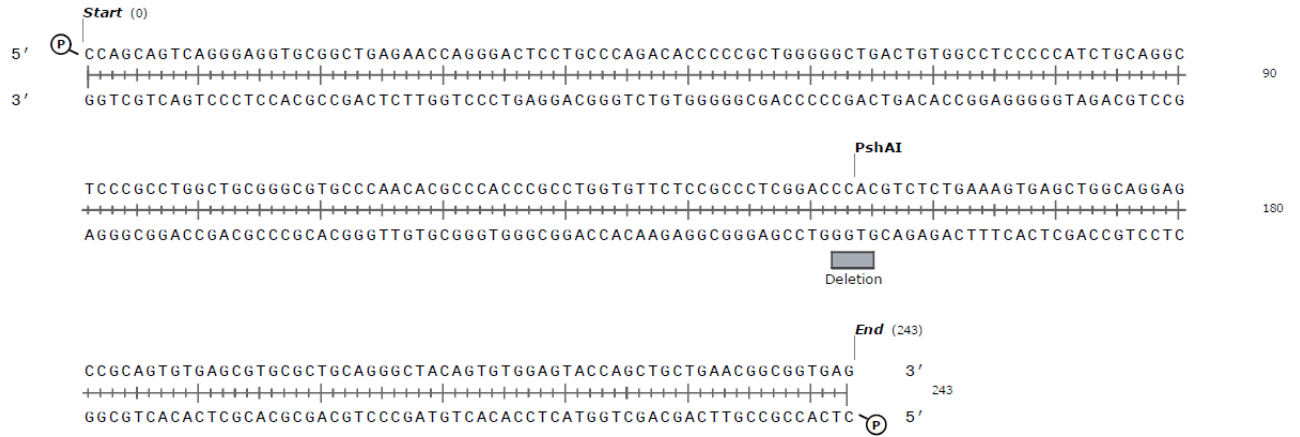

### B.) Restriction map analysis of mutated sequence (*AcyI*, *Hin1I*, *Hsp92I* and *BsaHI*)

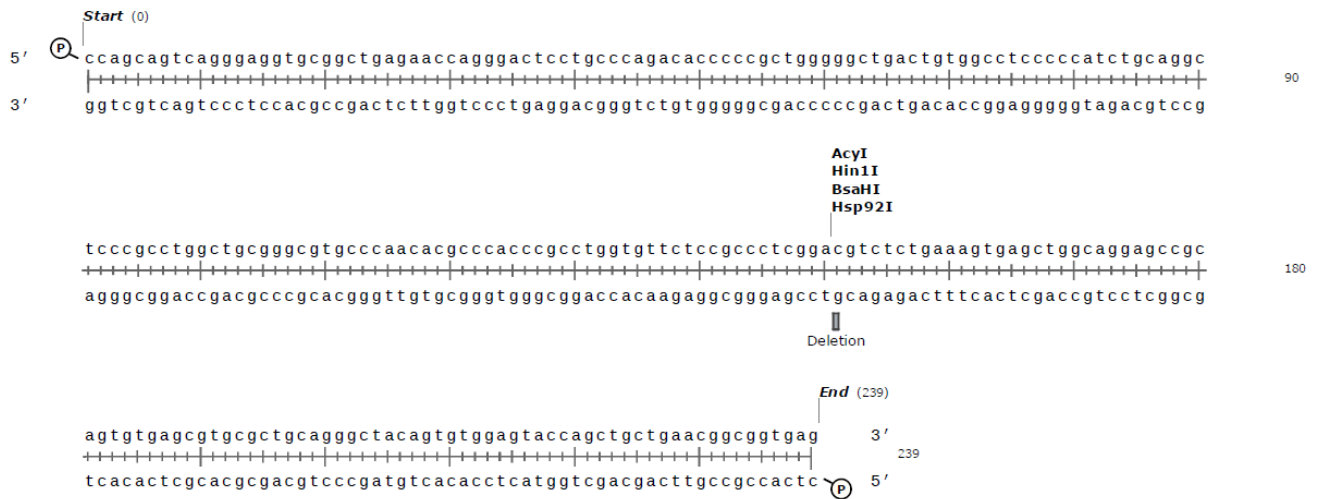

C). Agarose gel showing the RFLP produced with *PshAI* (cut wild-type sequence) and *AcyI* (cut mutated sequence)

***PshAI* digestion**

**MW:**  $\phi$ X174DNA – *HinfI* Digest  
**Lane 1:** Wild –type (+/+)  
**Lane 2:** Affected (EB/EB)  
**Lane 3:** Carrier (EB/+)

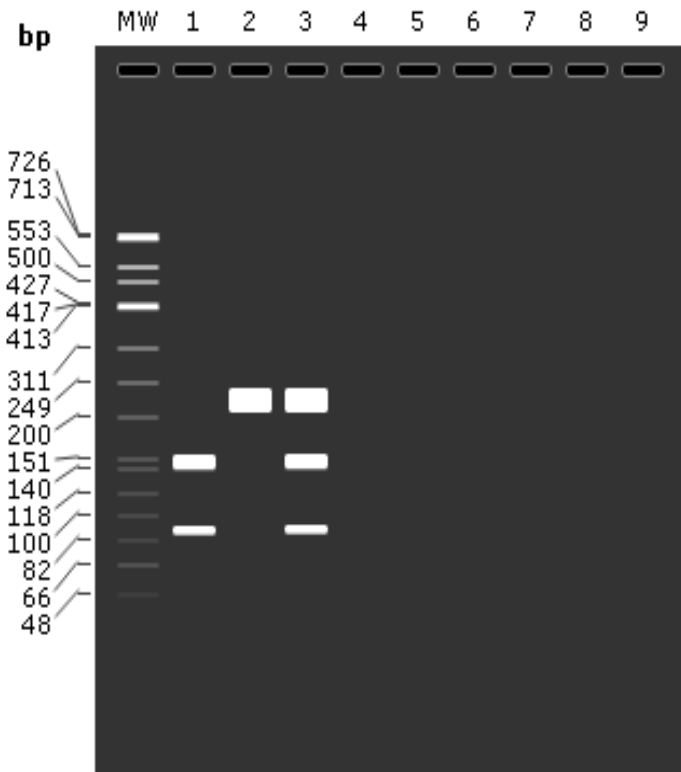

2.5 % agarose

Fragment size:  
 239 bp: undigested  
 153 bp + 90 bp (restriction fragments)

***AcyI* digestion**

**MW:**  $\phi$ X174DNA – *HinfI* Digest  
**Lane 1:** Wild –type (+/+)  
**Lane 2:** Affected (EB/EB)  
**Lane 3:** Carrier (EB/+)

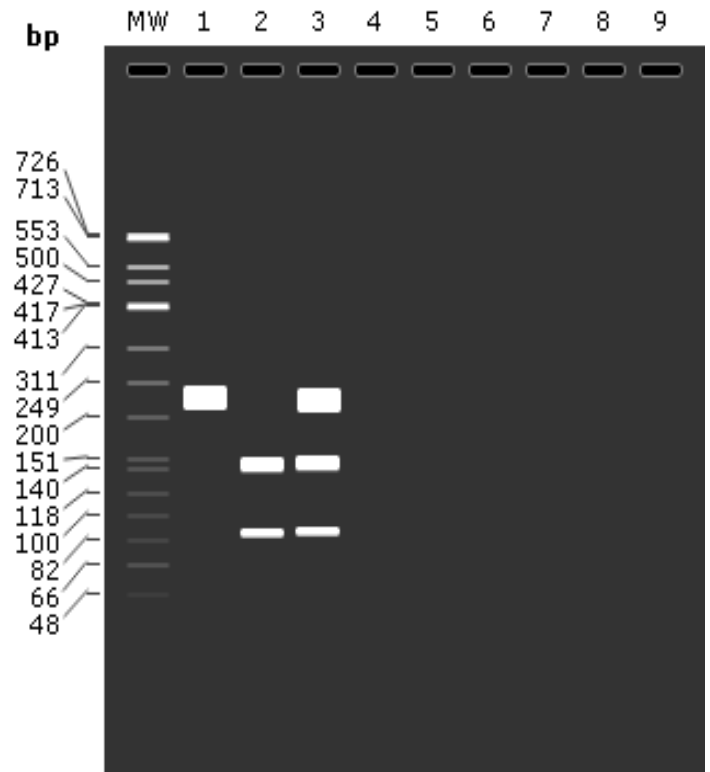

2.5 % agarose

Fragment size:  
 243 bp: undigested  
 89 bp + 150 bp (restriction fragments)
